# Supplementary material
Source: publisher figshare collection journal article supplement (https://gsapubs.figshare.com/articles/dataset/_/24088311)
Supplement: Supplementary file 1 [file 1]

## Sheet: General info
Sheet #
Grain size %		Grain size data of selected samples
Ash componentry		Componentry of the ash fraction of selected samples
Max. Clast (field meas.)		Mass and size data on maximum clast at different sites, directly measured in field
Density (coarse clasts)		Density data of coarse clasts ( according to clast type)
Mass on ground		Mass per square meter of the whole deposit, as directly measured in the field
Ballistics (from image analys.)		Relative position (x, y, in m) and size of ballistic blocks as derived from the analysis of aerial images
TGSD		Total grain size distribution of the whole deposit, resulting from the integration of the measured deposit (field) and the ballistic material derived from image analysis
Shape parameters PHI=-1		Solidity, Convexity and axial Ratio variability of clasts in the PHI=-1 class for the different types of clasts, as derived from image analysis of SEM images
Shape parameters PHI=1		Solidity, Convexity and axial Ratio variability of clasts in the PHI=1 class for the different types of clasts, as derived from image analysis of SEM images

## Sheet: Grain size %
Φ / Sample	PHM_1	PHM_2	PHM_3	PHM_4	PHM_5	PHM_6	PHM_7	PHM_9	PHM_10	PHM_18
6	0.00230055	0	0	0	0.0126507	0.0106983	0.00726741	0	0.034122	0.0254855
5	0.0218553	0.00666809	0	0.0355639	0.120182	0.192569	0.0690404	0.158508	0.648317	0.407768
4	0.0920222	0.0575122	4	0.7316	0.525006	0.99494	0.29433	1.26807	3.44632	2.1153
3	0.251911	0.37508	33.7	2.94672	1.50544	3.29507	0.799415	5.13567	11.9427	7.2124
2	0.353135	0.305898	57.6	1.21425	1.97352	3.39136	1.06831	2.67351	9.72476	8.41022
1	0.379591	0.0316734	3.6	0.127014	1.96087	2.61038	1.20276	1.16239	7.57507	6.52429
0	1.16752	0.0241718	0.6	0.328037	6.1284	14.2659	3.41315	16.5798	36.9194	17.8667
-1	2.22322	0.0258388	0.4	1.68363	9.38237	17.4825	3.59203	7.80413	22.7267	13.8432
-2	2.8773	0.00666809	0.1	3.20782	9.5507	17.5241	4.88279	23.5369	4.56151	9.04699
-3	12.5371	2.70536	0	12.5479	14.487	18.0029	7.2348	16.4309	0	10.2941
-4	40.3145	32.7428	0	27.7732	26.5004	13.8394	27.3796	25.2502	2.42117	24.2536
-5	39.7796	27.2789	0	49.4042	27.8535	8.39018	50.0565	0	0	0
-6		36.4395	0	0	0	0	0

## Sheet: Ash Componentry
Sample	Clast type	Vol. %
PHM_1	ALT	1.46865
	GLY	1.32178
	FLU	96.3284
	BLK	0.58746
	VES	0.29373
	CRYSTALS	0
PHM_4	ALT	22.8573
	GLY	16.6845
	FLU	8.68859
	BLK	31.2325
	VES	6.99368
	CRYSTALS	13.5433
PHM_5	ALT	42.6416
	GLY	22.0579
	FLU	4.42555
	BLK	13.7338
	VES	16.6141
	CRYSTALS	0.526972
PHM_6	ALT	33.856
	GLY	32.8849
	FLU	3.24577
	BLK	20.552
	VES	7.15615
	CRYSTALS	2.30521
PHM_7	ALT	38.5804
	GLY	29.2589
	FLU	1.40293
	BLK	22.9097
	VES	7.64379
	CRYSTALS	0.20429
PHM_9	ALT	32.8882
	GLY	21.4188
	FLU	5.37142
	BLK	28.0266
	VES	9.07394
	CRYSTALS	3.22105
PHM_10	ALT	43.4075
	GLY	20.6477
	FLU	2.54639
	BLK	23.37
	VES	9.26757
	CRYSTALS	0.760755
PHM_18	ALT	40.5225
	GLY	28.5701
	FLU	2.63193
	BLK	18.0544
	VES	10.2211
	CRYSTALS	0

## Sheet: Max. clast (field meas.)
# gps point	Distance from explosion site	Clast weigth (g)	a axis (cm)	b axis (cm)	c axis (cm)	mean (cm)	geometric mean (cm)
304	2	2102	15	15	12	14	13.92
304		1395	19	9	7	11.67	10.62
304		870	13	10	7	10	9.69
306	11.01	602	9	11	5	8.33	7.91
306		903	21	15	15	17	16.78
306		2716	14	12	7	11	10.56
308	22.13	1480	16	13	8	12.33	11.85
308		659	10	10	8	9.33	9.28
308		525	9	9	7	8.33	8.28
309	31.2	625	11	10	7	9.33	9.17
309		3820	24	15	10	16.33	15.33
309		622	10	8	9	9	8.96
310	39.43	390	9	8	4	7	6.6
310		249	8	7	3	6	5.52
310		2160	18	13	10	13.67	13.28
311	46.67	2186	20	19	4	14.33	11.5
311		451	10	8	5	7.67	7.37
311		430	10	7	6	7.67	7.49
315	57.8	158	7	6	4	5.67	5.52
315		1103	16	10	8	11.33	10.86
315		262	9	7	4	6.67	6.32
315		1413	15	10	15	13.33	13.1
316	65.75	470	10	8	6	8	7.83
316		480	9	6	5	6.67	6.46
316		886	14	8	9	10.33	10.03
317	76.8	390	12	12	5	9.67	8.96
317		373	8	7	4	6.33	6.07
317		335	10	5	5	6.67	6.3
318	98.6	446.03	10.85	8.85	6	8.57	8.32
318		319.41	9.05	7.8	5.6	7.48	7.34
318		158.81	7.3	6.05	4.3	5.88	5.75
319	115.8	68	7	4	3	4.67	4.38
319		358	8	7	5	6.67	6.54
319		93	7	4	3	4.67	4.38
324	29.76	14800	44	30	12	28.67	25.11
324		341	10	7	7	8	7.88
324		327	7	5	4	5.33	5.19
326	55.3	1420	15	11	10	12	11.82
326		474	12	9	8	9.67	9.52
326		558	11	9	9	9.67	9.62
327	93.59	992	12	10	9	10.33	10.26
327		409	9	5	4	6	5.65
327		55	10	7	4	7	6.54
328	160.33	742	13	11	3	9	7.54
329	32.31	13900	38	24	20	27.33	26.32
329		155	7	5	4	5.33	5.19
329		238	7	6	5	6	5.94
330	81.83	876	10	10	6	8.67	8.43
330		990	12	9	6	9	8.65
330		537	12	9	5	8.67	8.14
331	128.4	8000	38	23	10	23.67	20.6
331		315	9	9	4	7.33	6.87
331		210	8	7	3	6	5.52
332	192.01	3550	24	13	10	15.67	14.61

## Sheet: Density (coarse clasts)
Sample	Clast Type	Phi	Density (gcm-3)		Sample	Clast Type	Phi	Density (gcm-3)		Sample	Clast Type	Phi	Density (gcm-3)
PHM_14__1	PV	-5	2.02182		PHM_14__6	SV	-5	1.4524		PHM_14__21	G	-4	1.5683
PHM_14__2	PV	-5	1.75637		PHM_14__7	SV	-5	1.42472		PHM_14__22	G	-4	1.24551
PHM_14__3	PV	-5	1.71586		PHM_14__8	SV	-5	1.17155		PHM_14__23	G	-4
PHM_14__4	PV	-5	1.82911		PHM_14__9	SV	-5	1.44824		PHM_12_A_1	G	> -6	1.0446
PHM_14__5	PV	-5	1.54596		PHM_14__10	SV	-5	1.73385		PHM_12_A_2	G	> -6	1.20062
PHM_14__14	PV	-4	1.53746		PHM_14__11	SV	-5	1.41552		PHM_12_A_3	G	-6	1.19787
PHM_14__15	PV	-4	1.53197		PHM_14__12	SV	-5	1.56043		PHM_19__3	G	-6	1.30437
PHM_14__16	PV	-4	1.29129		PHM_14__13	SV	-5	1.48239
PHM_14__17	PV	-4	2.05794		PHM_14__18	SV	-4	1.42343
PHM_17__1	PV	-5	1.72233		PHM_14__19	SV	-4	1.331
PHM_17__2	PV	-5	1.71728		PHM_14__20	SV	-4	1.61169
PHM_17__3	PV	-5	1.57362		PHM_17__11	SV	-5	1.47451
PHM_17__4	PV	-5	2.01466		PHM_17__12	SV	-5	1.48634
PHM_17__5	PV	-5	1.87268		PHM_17__16	SV	-4	1.6605
PHM_17__6	PV	-5	1.70088		PHM_18__8	SV	-4	1.3491
PHM_17__7	PV	-5	1.7738		PHM_18__9	SV	-4	1.1725
PHM_17__8	PV	-5	1.91104		PHM_8__3	SV	-5	1.35823
PHM_17__9	PV	-5	1.56751		PHM_8__4	SV	-5	1.21399
PHM_17__10	PV	-5	1.89025		PHM_2__10	SV	-4	1.202
PHM_17__13	PV	-4	1.61178		PHM_2__11	SV	-4	1.304
PHM_17__14	PV	-4	1.79221		PHM_2__12	SV	-4	1.08286
PHM_17__15	PV	-4	1.41929		PHM_4__6	SV	-5	1.53179
PHM_19__4	PV	-5	1.75873		PHM_4__7	SV	-5	1.42067
PHM_19__5	PV	-4	1.764		PHM_4__8	SV	-5	1.7043
PHM_19__6	PV	-4	1.44206		PHM_7__7	SV	-5	1.51726
PHM_8__1	PV	-6	1.92819		PHM_29_V_1	SV	-6	1.48001
PHM_8__2	PV	-5	1.72243
PHM_2__2	PV	-5	1.67792
PHM_2__3	PV	-5	1.73439
PHM_2__4	PV	-5	1.57039
PHM_2__5	PV	-4	1.31467
PHM_2__6	PV	-4	1.5977
PHM_2__7	PV	-4	1.73884
PHM_2__8	PV	-4	1.81029
PHM_2__9	PV	-4	1.426
PHM_4__1	PV	-5	1.75533
PHM_4__2	PV	-5	1.79336
PHM_4__3	PV	-5	1.49963
PHM_4__4	PV	-5	1.71167
PHM_4__5	PV	-5	1.84811
PHM_5__1	PV	-5	1.4695
PHM_5__2	PV	-5	1.74067
PHM_5__3	PV	-5	1.48568
PHM_5__4	PV	-5	1.54117
PHM_5__5	PV	-5	1.61367
PHM_5__6	PV	-5	1.51562
PHM_5__7	PV	-5	1.70492
PHM_6__1	PV	-5	1.83161

## Sheet: Mass on ground
Clast number	# gps point	Distance from explosion site	Mass on ground (kg/m2)
89	304	2	36.2
90	306	11.01	15.9
91	308	22.13	15.5
92	309	31.3	12.5
93	310	41.43	8.4
94	311	48.67	6.7
95	315	59.8	4.9
97	316	67.75	0.29
98	317	78.8	0.18
99	318	100.6	0.06
100	319	117.8	0.05
101	320	141.03
102	321	143.8	0.06
103	324	31.76	11.2
104	326*	57.3	0.72
105	327	95.59	0.23
106	328	162.33	-
107	329	34.31	6.2
108	330	83.83	0.45
109	331	130.4	0.1
110	332	194.01	-

## Sheet: Ballistics (from image analys.)
Relative position (m)		Equivalent diameter (m)	Phi
x	y
76.563	52.818	0.879123	-9.77992
72.359	67.816	0.738205	-9.52788
77.938	21.495	0.612867	-9.25943
72.932	61.646	0.536425	-9.06723
79.259	43.175	0.499555	-8.9645
73.223	66.302	0.493142	-8.94586
73.326	56.564	0.490553	-8.93827
76.482	56.837	0.487951	-8.93059
78.514	43.077	0.478731	-8.90307
73.229	68.068	0.419174	-8.71141
72.276	62.318	0.416126	-8.70088
78.664	47.11	0.395738	-8.6284
78.816	46.4	0.390882	-8.61059
77.655	37.478	0.390882	-8.61059
71.597	33.804	0.380985	-8.57359
72.336	60.41	0.363891	-8.50736
64.492	97.372	0.362138	-8.50039
64.176	77.287	0.362138	-8.50039
56.204	86.226	0.358605	-8.48625
74.417	66.723	0.356825	-8.47907
73.724	66.076	0.356825	-8.47907
74.649	65.358	0.356825	-8.47907
77.362	42.823	0.356825	-8.47907
79.541	40.04	0.356825	-8.47907
73.903	67.111	0.34779	-8.44207
79.374	42.268	0.345955	-8.43444
53.903	83.936	0.332824	-8.37862
69.195	65.493	0.332824	-8.37862
71.266	60.488	0.332824	-8.37862
66.675	87.884	0.330906	-8.37028
74.237	31.298	0.330906	-8.37028
65.32	74.267	0.328976	-8.36184
79.234	41.292	0.323119	-8.33592
76.851	60.037	0.321142	-8.32707
49.053	52.052	0.319154	-8.31811
70.361	43.068	0.317153	-8.30903
64.412	71.895	0.311073	-8.28111
76.063	40.685	0.311073	-8.28111
45.937	11.659	0.311073	-8.28111
73.267	62.331	0.306952	-8.26187
67.446	87.932	0.304871	-8.25206
58.465	53.521	0.304871	-8.25206
65.891	88.507	0.302776	-8.24211
76.142	38.852	0.302776	-8.24211
52.845	12.562	0.302776	-8.24211
78.228	56.984	0.298541	-8.22179
69.868	66.823	0.296401	-8.21141
64.968	92.906	0.294245	-8.20088
79.057	39.986	0.294245	-8.20088
63.528	83.647	0.292074	-8.19019
66.543	76.477	0.292074	-8.19019
46.497	64.663	0.292074	-8.19019
75.402	63.466	0.292074	-8.19019
75.536	62.793	0.289886	-8.17934
64.535	63.593	0.287681	-8.16833
76.326	59.139	0.287681	-8.16833
77.553	23.684	0.287681	-8.16833
69.368	72.636	0.28546	-8.15714
78.471	47.831	0.28546	-8.15714
78.641	37.353	0.28546	-8.15714
70.692	62.681	0.283221	-8.14578
78.346	25.861	0.283221	-8.14578
66.191	89.61	0.280964	-8.13424
61.686	88.277	0.280964	-8.13424
75.249	62.621	0.280964	-8.13424
78.44	45.132	0.280964	-8.13424
75.08	61.327	0.276395	-8.11059
72.106	61.249	0.276395	-8.11059
71.828	56.7	0.274082	-8.09847
71.258	63.224	0.27175	-8.08613
76.58	45.693	0.27175	-8.08613
62.353	16.562	0.27175	-8.08613
61.7	50.142	0.269397	-8.07359
78.931	47.807	0.269397	-8.07359
71.979	39.16	0.269397	-8.07359
78.306	36.512	0.269397	-8.07359
64.064	32.672	0.269397	-8.07359
77.334	17.344	0.269397	-8.07359
68.473	72.862	0.267023	-8.06082
74.28	64.594	0.267023	-8.06082
69.43	58.804	0.267023	-8.06082
73.315	57.726	0.267023	-8.06082
79.094	49.746	0.264628	-8.04782
78.93	44.658	0.264628	-8.04782
72.127	64.989	0.262212	-8.03459
74.815	39.224	0.259772	-8.0211
71.604	38.821	0.259772	-8.0211
74.548	28.201	0.259772	-8.0211
61.274	89.191	0.25731	-8.00736
50.054	70.322	0.25731	-8.00736
73.554	64.22	0.25731	-8.00736
74.794	64.112	0.25731	-8.00736
71.54	63.915	0.25731	-8.00736
79.105	41.946	0.25731	-8.00736
74.644	24.98	0.25731	-8.00736
63.35	94.56	0.254824	-7.99336
62.399	94.344	0.254824	-7.99336
72.373	66.618	0.254824	-7.99336
51.982	65.039	0.254824	-7.99336
71.716	61.055	0.254824	-7.99336
72.366	36.199	0.254824	-7.99336
44.165	70.189	0.252313	-7.97907
50.026	59.406	0.252313	-7.97907
65.296	41.006	0.252313	-7.97907
78.792	29.316	0.252313	-7.97907
55.021	11.195	0.249777	-7.9645
60.697	91.184	0.247215	-7.94963
75.098	64.477	0.247215	-7.94963
75.754	63.085	0.247215	-7.94963
69.871	57.246	0.247215	-7.94963
76.642	51.777	0.247215	-7.94963
69.537	47.39	0.247215	-7.94963
72.916	42.391	0.247215	-7.94963
58.77	32.692	0.247215	-7.94963
78.117	30.374	0.247215	-7.94963
65.542	15.042	0.247215	-7.94963
51.94	13.65	0.247215	-7.94963
62.961	85.013	0.244627	-7.93444
70.234	65.506	0.244627	-7.93444
74.385	51.693	0.244627	-7.93444
65.578	91.347	0.24201	-7.91893
62.664	79.966	0.24201	-7.91893
70.049	69.002	0.24201	-7.91893
43.206	64.349	0.24201	-7.91893
74.599	52.451	0.24201	-7.91893
76.579	44.817	0.24201	-7.91893
79.555	38.579	0.24201	-7.91893
63.478	16.689	0.24201	-7.91893
67.427	88.297	0.239365	-7.90307
59.432	87.352	0.239365	-7.90307
72.66	63.602	0.239365	-7.90307
74.86	60.998	0.239365	-7.90307
72.492	58.497	0.239365	-7.90307
72.411	55.126	0.239365	-7.90307
79	34.711	0.239365	-7.90307
37.176	19.093	0.239365	-7.90307
63.919	88.736	0.236691	-7.88686
62.247	78.96	0.236691	-7.88686
71.629	65.814	0.236691	-7.88686
72.182	65.349	0.236691	-7.88686
75.344	52.26	0.236691	-7.88686
61.928	40.229	0.236691	-7.88686
26.015	35.849	0.236691	-7.88686
59.836	76.044	0.233986	-7.87028
61.407	88.261	0.231249	-7.8533
64.882	85.958	0.231249	-7.8533
56.197	82.781	0.231249	-7.8533
57.937	79.431	0.231249	-7.8533
63.823	77.879	0.231249	-7.8533
59.476	70.46	0.231249	-7.8533
68.625	59.115	0.231249	-7.8533
77.429	54.792	0.231249	-7.8533
78.733	40.635	0.231249	-7.8533
41.704	20.649	0.231249	-7.8533
61.018	11.372	0.231249	-7.8533
65.831	87.305	0.228479	-7.83592
63.613	80.931	0.228479	-7.83592
69.662	71.097	0.228479	-7.83592
71.473	66.453	0.228479	-7.83592
69.825	51.859	0.228479	-7.83592
79.344	48.673	0.228479	-7.83592
76.244	47.34	0.228479	-7.83592
64.378	88.993	0.225676	-7.81811
62.179	88.511	0.225676	-7.81811
71.538	59.921	0.225676	-7.81811
79.586	47.436	0.225676	-7.81811
78.4	46.962	0.225676	-7.81811
62.599	47.024	0.225676	-7.81811
75.328	42.38	0.225676	-7.81811
78.863	41.714	0.225676	-7.81811
63.399	36.788	0.225676	-7.81811
29.916	25.75	0.225676	-7.81811
61.018	91.368	0.222837	-7.79985
68.225	77.06	0.222837	-7.79985
73.111	64.667	0.222837	-7.79985
70.966	55.845	0.222837	-7.79985
78.718	45.463	0.222837	-7.79985
60.692	42.248	0.222837	-7.79985
76.567	40.826	0.222837	-7.79985
78.125	34.483	0.222837	-7.79985
34.615	18.923	0.222837	-7.79985
61.909	90.764	0.219962	-7.78111
62.643	90.22	0.219962	-7.78111
59.382	83.587	0.219962	-7.78111
60.927	75.612	0.219962	-7.78111
70.783	64.138	0.219962	-7.78111
75.923	57.146	0.219962	-7.78111
78.617	51.738	0.219962	-7.78111
77.011	44.143	0.219962	-7.78111
66.993	41.496	0.219962	-7.78111
37.016	28.047	0.219962	-7.78111
61.931	90.113	0.217048	-7.76187
59.628	80.698	0.217048	-7.76187
65.271	77.786	0.217048	-7.76187
72.868	67.33	0.217048	-7.76187
74.6	54.907	0.217048	-7.76187
57.781	41.444	0.217048	-7.76187
74.47	38.296	0.217048	-7.76187
70.849	28.967	0.217048	-7.76187
73.698	25.293	0.217048	-7.76187
60.121	81.366	0.214095	-7.74211
60.514	77.549	0.214095	-7.74211
61.206	70.371	0.214095	-7.74211
46.888	63.546	0.214095	-7.74211
75.106	55.344	0.214095	-7.74211
75.069	49.461	0.214095	-7.74211
73.27	45.808	0.214095	-7.74211
76.808	44.356	0.214095	-7.74211
36.359	41.866	0.214095	-7.74211
30.782	38.886	0.214095	-7.74211
76.459	35.57	0.214095	-7.74211
67.993	33.312	0.214095	-7.74211
78.32	26.822	0.214095	-7.74211
72.452	23.889	0.214095	-7.74211
78.108	23.36	0.214095	-7.74211
38.395	19.009	0.214095	-7.74211
70.132	18.037	0.214095	-7.74211
62.992	92.497	0.2111	-7.72179
58.467	88.56	0.2111	-7.72179
62.549	76.762	0.2111	-7.72179
60.153	73.251	0.2111	-7.72179
70.116	66.483	0.2111	-7.72179
73.81	59.937	0.2111	-7.72179
73.799	59.448	0.2111	-7.72179
76.331	55.948	0.2111	-7.72179
78.611	51.127	0.2111	-7.72179
79.289	44.133	0.2111	-7.72179
74.623	26.46	0.2111	-7.72179
75.216	23.185	0.2111	-7.72179
73.815	17.206	0.2111	-7.72179
59.76	84.584	0.208063	-7.70088
55.51	80.095	0.208063	-7.70088
64.491	77.594	0.208063	-7.70088
68.388	73.467	0.208063	-7.70088
62.365	70.697	0.208063	-7.70088
63.758	68.136	0.208063	-7.70088
66.882	61.21	0.208063	-7.70088
49.653	59.471	0.208063	-7.70088
73.456	58.164	0.208063	-7.70088
76.79	57.468	0.208063	-7.70088
76.617	46.949	0.208063	-7.70088
61.713	37.095	0.208063	-7.70088
28.874	17.835	0.208063	-7.70088
31.304	17.518	0.208063	-7.70088
33.78	16.822	0.208063	-7.70088
60.688	16.639	0.208063	-7.70088
56.232	85.098	0.20498	-7.67934
66.901	77.606	0.20498	-7.67934
68.173	62.179	0.20498	-7.67934
68.656	62.166	0.20498	-7.67934
61.313	54.061	0.20498	-7.67934
77.8	53.12	0.20498	-7.67934
69.052	48.207	0.20498	-7.67934
78.998	37.183	0.20498	-7.67934
45.556	10.059	0.20498	-7.67934
67.015	88.876	0.201851	-7.65714
68.473	71.226	0.201851	-7.65714
52.601	67.527	0.201851	-7.65714
74.205	67.108	0.201851	-7.65714
51.297	66.872	0.201851	-7.65714
69.509	66.448	0.201851	-7.65714
51.331	60.765	0.201851	-7.65714
73.946	57.091	0.201851	-7.65714
79.396	49.031	0.201851	-7.65714
65.095	48.525	0.201851	-7.65714
63.243	46.983	0.201851	-7.65714
78.044	45.974	0.201851	-7.65714
78.157	41.691	0.201851	-7.65714
72.873	39.946	0.201851	-7.65714
71.011	37.452	0.201851	-7.65714
66.375	36.783	0.201851	-7.65714
22.756	23.223	0.201851	-7.65714
77.03	20.011	0.201851	-7.65714
65.591	88.23	0.198672	-7.63424
62.112	87.82	0.198672	-7.63424
61.145	86.258	0.198672	-7.63424
65.151	60.497	0.198672	-7.63424
73.097	60.525	0.198672	-7.63424
77.693	49.922	0.198672	-7.63424
78.846	39.049	0.198672	-7.63424
78.405	33.02	0.198672	-7.63424
52.709	32.921	0.198672	-7.63424
37.567	18.549	0.198672	-7.63424
72.121	15.067	0.198672	-7.63424
63.162	13.47	0.198672	-7.63424
67.142	87.092	0.195441	-7.61059
55.414	83.438	0.195441	-7.61059
62.712	77.995	0.195441	-7.61059
68.071	74.915	0.195441	-7.61059
57.134	74.804	0.195441	-7.61059
67.014	71.312	0.195441	-7.61059
56.773	70.557	0.195441	-7.61059
67.825	70.425	0.195441	-7.61059
71.504	68.762	0.195441	-7.61059
71.082	67.549	0.195441	-7.61059
73.859	66.623	0.195441	-7.61059
73.392	64.817	0.195441	-7.61059
49.415	63.662	0.195441	-7.61059
61.573	56.737	0.195441	-7.61059
79.237	52.324	0.195441	-7.61059
30.333	46.342	0.195441	-7.61059
63.951	40.041	0.195441	-7.61059
74.347	39.484	0.195441	-7.61059
68.106	36.966	0.195441	-7.61059
76.58	36.728	0.195441	-7.61059
77.634	36.258	0.195441	-7.61059
62.104	34.92	0.195441	-7.61059
76.474	33.948	0.195441	-7.61059
73.483	33.069	0.195441	-7.61059
72.757	27.62	0.195441	-7.61059
49.881	25.531	0.195441	-7.61059
52.212	23.749	0.195441	-7.61059
78.135	22.711	0.195441	-7.61059
66.005	18.219	0.195441	-7.61059
31.19	18.129	0.195441	-7.61059
62.911	16.771	0.195441	-7.61059
52.336	13.384	0.195441	-7.61059
63.596	12.839	0.195441	-7.61059
63.247	12.305	0.195441	-7.61059
58.695	86.234	0.192156	-7.58613
55.093	82.829	0.192156	-7.58613
44.57	71.276	0.192156	-7.58613
60.245	70.636	0.192156	-7.58613
69.322	69.41	0.192156	-7.58613
52.51	63.174	0.192156	-7.58613
71.359	53.414	0.192156	-7.58613
78.328	52.677	0.192156	-7.58613
64.615	43.14	0.192156	-7.58613
64.109	40.786	0.192156	-7.58613
74.454	38.894	0.192156	-7.58613
79.162	33.022	0.192156	-7.58613
72.887	30.856	0.192156	-7.58613
46.699	22.469	0.192156	-7.58613
76.408	15.927	0.192156	-7.58613
62.152	93.574	0.188814	-7.56082
55.35	77.276	0.188814	-7.56082
63.278	75.299	0.188814	-7.56082
61.362	74.094	0.188814	-7.56082
60.649	73.038	0.188814	-7.56082
65.418	71.802	0.188814	-7.56082
44.996	71.451	0.188814	-7.56082
46.79	70.675	0.188814	-7.56082
68.06	68.96	0.188814	-7.56082
74.355	65.211	0.188814	-7.56082
71.959	64.364	0.188814	-7.56082
70.645	59.668	0.188814	-7.56082
67.874	58.839	0.188814	-7.56082
74.464	47.975	0.188814	-7.56082
72.235	45.967	0.188814	-7.56082
74.23	44.641	0.188814	-7.56082
76.297	43.66	0.188814	-7.56082
53.206	39.345	0.188814	-7.56082
73.704	39.004	0.188814	-7.56082
56.931	38.783	0.188814	-7.56082
76.209	32.442	0.188814	-7.56082
74.655	32.029	0.188814	-7.56082
73.413	25.531	0.188814	-7.56082
70.573	21.988	0.188814	-7.56082
74.585	20.582	0.188814	-7.56082
76.778	19.133	0.188814	-7.56082
29.242	18.621	0.188814	-7.56082
65.458	18.238	0.188814	-7.56082
75.225	17.446	0.188814	-7.56082
63.199	83.306	0.185412	-7.53459
54.103	76.18	0.185412	-7.53459
70.09	66.763	0.185412	-7.53459
73.563	65.534	0.185412	-7.53459
72.599	61.012	0.185412	-7.53459
71.068	58.572	0.185412	-7.53459
67.021	52.095	0.185412	-7.53459
79.439	46.879	0.185412	-7.53459
76.888	45.205	0.185412	-7.53459
78.512	41.508	0.185412	-7.53459
78.538	40.841	0.185412	-7.53459
66.693	40.571	0.185412	-7.53459
76.478	39.881	0.185412	-7.53459
63.533	35.817	0.185412	-7.53459
79.234	35.635	0.185412	-7.53459
73.529	30.627	0.185412	-7.53459
77.733	20.723	0.185412	-7.53459
28.842	17.483	0.185412	-7.53459
34.559	15.986	0.185412	-7.53459
64.792	15.177	0.185412	-7.53459
64.667	87.052	0.181946	-7.50736
56.801	82.44	0.181946	-7.50736
55.922	80.788	0.181946	-7.50736
59.779	79.139	0.181946	-7.50736
50.203	78.131	0.181946	-7.50736
58.688	74.236	0.181946	-7.50736
69.455	71.037	0.181946	-7.50736
71.568	60.401	0.181946	-7.50736
74.718	59.48	0.181946	-7.50736
72.191	56.82	0.181946	-7.50736
76.823	55.217	0.181946	-7.50736
61.265	53.153	0.181946	-7.50736
68.123	50.323	0.181946	-7.50736
78.643	46.013	0.181946	-7.50736
75.361	43.608	0.181946	-7.50736
61.118	42.744	0.181946	-7.50736
72.358	41.423	0.181946	-7.50736
75.879	36.373	0.181946	-7.50736
73.065	33.878	0.181946	-7.50736
75.643	23.959	0.181946	-7.50736
57.469	20.156	0.181946	-7.50736
37.429	18.238	0.181946	-7.50736
66.562	17.864	0.181946	-7.50736
63.346	14.58	0.181946	-7.50736
65.697	78.022	0.178412	-7.47907
67.226	75.548	0.178412	-7.47907
49.945	73.547	0.178412	-7.47907
69.042	73.336	0.178412	-7.47907
48.787	69.798	0.178412	-7.47907
74.264	64.3	0.178412	-7.47907
75.818	62.465	0.178412	-7.47907
73.897	62.446	0.178412	-7.47907
73.333	61.443	0.178412	-7.47907
71.09	59.106	0.178412	-7.47907
65.889	59.066	0.178412	-7.47907
69.145	57.208	0.178412	-7.47907
70.255	55.48	0.178412	-7.47907
72.995	52.171	0.178412	-7.47907
79.103	48.527	0.178412	-7.47907
78.261	43.61	0.178412	-7.47907
60.686	39.925	0.178412	-7.47907
79.191	37.512	0.178412	-7.47907
63.934	36.035	0.178412	-7.47907
62.005	35.932	0.178412	-7.47907
71.341	23.161	0.178412	-7.47907
60.569	18.489	0.178412	-7.47907
65.396	88.245	0.174808	-7.44963
65.025	87.125	0.174808	-7.44963
58.318	86.456	0.174808	-7.44963
60.753	86.432	0.174808	-7.44963
63.617	84.32	0.174808	-7.44963
64.084	83.832	0.174808	-7.44963
54.859	77.195	0.174808	-7.44963
61.88	76.123	0.174808	-7.44963
63.399	74.619	0.174808	-7.44963
59.538	74.086	0.174808	-7.44963
61.98	73.554	0.174808	-7.44963
46.685	72.457	0.174808	-7.44963
45.487	71.433	0.174808	-7.44963
72.756	64.015	0.174808	-7.44963
72.183	61.912	0.174808	-7.44963
38.426	60.971	0.174808	-7.44963
70.366	59.784	0.174808	-7.44963
66.313	59.381	0.174808	-7.44963
77.517	57.863	0.174808	-7.44963
71.43	55.941	0.174808	-7.44963
74.642	55.362	0.174808	-7.44963
75.475	54.846	0.174808	-7.44963
60.294	53.611	0.174808	-7.44963
65.896	51.272	0.174808	-7.44963
71.463	49.881	0.174808	-7.44963
77.19	47.988	0.174808	-7.44963
79.17	45.175	0.174808	-7.44963
75.553	44.073	0.174808	-7.44963
74.146	40.167	0.174808	-7.44963
68.248	38.817	0.174808	-7.44963
60.941	31.347	0.174808	-7.44963
59.638	26.236	0.174808	-7.44963
56.986	21.325	0.174808	-7.44963
48.084	21.31	0.174808	-7.44963
70.263	17.729	0.174808	-7.44963
66.483	12.704	0.174808	-7.44963
55.279	10.548	0.174808	-7.44963
62.084	85.804	0.171127	-7.41893
65.408	85.656	0.171127	-7.41893
53.703	80.764	0.171127	-7.41893
62.757	79.204	0.171127	-7.41893
67.062	77.174	0.171127	-7.41893
62.726	75.51	0.171127	-7.41893
56.649	73.572	0.171127	-7.41893
58.165	68.747	0.171127	-7.41893
71	63.233	0.171127	-7.41893
70.275	62.168	0.171127	-7.41893
64.056	59.969	0.171127	-7.41893
67.881	57.798	0.171127	-7.41893
74.486	57.342	0.171127	-7.41893
73.085	57.299	0.171127	-7.41893
72.049	54.416	0.171127	-7.41893
75.416	47.019	0.171127	-7.41893
63.203	46.013	0.171127	-7.41893
61.619	42.897	0.171127	-7.41893
69.918	42.06	0.171127	-7.41893
75.283	38.161	0.171127	-7.41893
71.676	31.685	0.171127	-7.41893
78.71	30.251	0.171127	-7.41893
50.601	11.849	0.171127	-7.41893
59.566	90.573	0.167366	-7.38686
65.312	87.171	0.167366	-7.38686
63.431	77.391	0.167366	-7.38686
61.437	76.605	0.167366	-7.38686
53.859	71.387	0.167366	-7.38686
53.733	68.907	0.167366	-7.38686
68.488	67.032	0.167366	-7.38686
61.076	63.97	0.167366	-7.38686
40.64	62.683	0.167366	-7.38686
75.603	62.371	0.167366	-7.38686
70.832	61.603	0.167366	-7.38686
72.901	60.943	0.167366	-7.38686
62.545	58.785	0.167366	-7.38686
67.293	58.571	0.167366	-7.38686
36.793	58.353	0.167366	-7.38686
50.534	57.077	0.167366	-7.38686
70.495	54.545	0.167366	-7.38686
62.059	51.959	0.167366	-7.38686
78.664	50.125	0.167366	-7.38686
76.868	49.537	0.167366	-7.38686
76.156	48.179	0.167366	-7.38686
64.877	46.675	0.167366	-7.38686
78.281	46.155	0.167366	-7.38686
75.417	45.737	0.167366	-7.38686
79.008	45.645	0.167366	-7.38686
78.543	45.396	0.167366	-7.38686
67.32	41.477	0.167366	-7.38686
76.393	41.376	0.167366	-7.38686
65.801	39.071	0.167366	-7.38686
75.814	38.757	0.167366	-7.38686
69.631	37.296	0.167366	-7.38686
69.6	36.866	0.167366	-7.38686
65.717	35.274	0.167366	-7.38686
30.977	32.596	0.167366	-7.38686
75.201	27.289	0.167366	-7.38686
67.179	24.243	0.167366	-7.38686
72.348	24.183	0.167366	-7.38686
59.563	15.33	0.167366	-7.38686
63.997	14.687	0.167366	-7.38686
67.173	89.136	0.163518	-7.3533
63.389	84.245	0.163518	-7.3533
61.983	82.124	0.163518	-7.3533
64.215	81.786	0.163518	-7.3533
56.347	76.004	0.163518	-7.3533
61.864	72.426	0.163518	-7.3533
68.9	72.317	0.163518	-7.3533
62.284	68.864	0.163518	-7.3533
72.822	68.528	0.163518	-7.3533
70.059	65.914	0.163518	-7.3533
74.27	61.862	0.163518	-7.3533
76.025	60.265	0.163518	-7.3533
76.602	57.088	0.163518	-7.3533
49.472	54.828	0.163518	-7.3533
38.598	52.92	0.163518	-7.3533
77.402	48.81	0.163518	-7.3533
72.888	43.351	0.163518	-7.3533
75.428	39.855	0.163518	-7.3533
78.92	38.068	0.163518	-7.3533
76.305	37.715	0.163518	-7.3533
79.494	35.768	0.163518	-7.3533
66.89	27.392	0.163518	-7.3533
60.146	26.958	0.163518	-7.3533
36.236	23.541	0.163518	-7.3533
71.115	22.158	0.163518	-7.3533
61.227	17.456	0.163518	-7.3533
50.657	16.47	0.163518	-7.3533
40.595	15.476	0.163518	-7.3533
57.863	14.477	0.163518	-7.3533
53.177	9.073	0.163518	-7.3533
63.855	95.444	0.159577	-7.31811
63.934	95.017	0.159577	-7.31811
63.239	94.196	0.159577	-7.31811
60.247	91.753	0.159577	-7.31811
66.042	89.986	0.159577	-7.31811
58.069	88.922	0.159577	-7.31811
58.444	88.839	0.159577	-7.31811
66.985	87.764	0.159577	-7.31811
66.072	87.035	0.159577	-7.31811
59.148	84.214	0.159577	-7.31811
64.218	84.187	0.159577	-7.31811
55.121	83.85	0.159577	-7.31811
64.906	82.948	0.159577	-7.31811
60.822	80.318	0.159577	-7.31811
63.573	78.676	0.159577	-7.31811
51.986	78.308	0.159577	-7.31811
67.896	78.064	0.159577	-7.31811
53.895	74.819	0.159577	-7.31811
57.716	73.582	0.159577	-7.31811
68.919	71.974	0.159577	-7.31811
68.088	69.83	0.159577	-7.31811
43.622	68.722	0.159577	-7.31811
55.475	66.972	0.159577	-7.31811
63.002	65.955	0.159577	-7.31811
72.923	65.618	0.159577	-7.31811
60.698	65.236	0.159577	-7.31811
69.332	64.193	0.159577	-7.31811
55.874	62.525	0.159577	-7.31811
64.577	61.074	0.159577	-7.31811
66.224	60.734	0.159577	-7.31811
72.667	59.788	0.159577	-7.31811
76.288	59.633	0.159577	-7.31811
77.742	57.044	0.159577	-7.31811
76.089	55.743	0.159577	-7.31811
78.19	54.268	0.159577	-7.31811
69.127	52.695	0.159577	-7.31811
41.576	51.373	0.159577	-7.31811
74.998	50.481	0.159577	-7.31811
61.416	48.99	0.159577	-7.31811
72.236	48.414	0.159577	-7.31811
68.027	48.364	0.159577	-7.31811
78.791	43.775	0.159577	-7.31811
73.412	43.284	0.159577	-7.31811
31.906	42.942	0.159577	-7.31811
64.197	42.427	0.159577	-7.31811
78.782	40.124	0.159577	-7.31811
78.182	40.078	0.159577	-7.31811
77.136	36.608	0.159577	-7.31811
52.359	36.525	0.159577	-7.31811
77.486	32.79	0.159577	-7.31811
69.161	31.932	0.159577	-7.31811
55.896	31.386	0.159577	-7.31811
49.97	27.459	0.159577	-7.31811
76.664	24.896	0.159577	-7.31811
77.648	20.233	0.159577	-7.31811
66.903	18.657	0.159577	-7.31811
77.03	18.624	0.159577	-7.31811
72.07	17.9	0.159577	-7.31811
58.89	15.028	0.159577	-7.31811
51.292	14.962	0.159577	-7.31811
65.933	91.778	0.155536	-7.28111
62.196	91.56	0.155536	-7.28111
62.814	88.764	0.155536	-7.28111
65.621	86.602	0.155536	-7.28111
62.719	80.556	0.155536	-7.28111
61.917	74.72	0.155536	-7.28111
65.503	73.876	0.155536	-7.28111
68.097	73.176	0.155536	-7.28111
52.244	71.297	0.155536	-7.28111
53.455	70.122	0.155536	-7.28111
65.584	69.983	0.155536	-7.28111
45.568	69.199	0.155536	-7.28111
59.028	68.323	0.155536	-7.28111
71.36	67.74	0.155536	-7.28111
46.961	65.823	0.155536	-7.28111
65.314	65.365	0.155536	-7.28111
75.165	63.347	0.155536	-7.28111
62.145	63.179	0.155536	-7.28111
69.063	62.989	0.155536	-7.28111
74.077	61.954	0.155536	-7.28111
75.452	61.833	0.155536	-7.28111
74.092	61.347	0.155536	-7.28111
66.618	60.819	0.155536	-7.28111
48.594	59.089	0.155536	-7.28111
36.201	57.266	0.155536	-7.28111
69.692	56.698	0.155536	-7.28111
69.242	56.651	0.155536	-7.28111
70.881	56.464	0.155536	-7.28111
69.904	55.406	0.155536	-7.28111
76.788	51.251	0.155536	-7.28111
71.294	49.722	0.155536	-7.28111
71.144	47.679	0.155536	-7.28111
74.211	47.526	0.155536	-7.28111
77.214	45.316	0.155536	-7.28111
72.134	43.416	0.155536	-7.28111
73.498	41.8	0.155536	-7.28111
79.389	40.666	0.155536	-7.28111
75.668	40.595	0.155536	-7.28111
76.325	37.107	0.155536	-7.28111
75.839	37.119	0.155536	-7.28111
65.112	37.026	0.155536	-7.28111
74.784	35.639	0.155536	-7.28111
66.928	34.864	0.155536	-7.28111
36.739	28.688	0.155536	-7.28111
54.085	21.643	0.155536	-7.28111
43.014	15.032	0.155536	-7.28111
44.81	9.99	0.155536	-7.28111
62.938	89.53	0.151388	-7.24211
59.057	87.567	0.151388	-7.24211
63.576	87.054	0.151388	-7.24211
63.831	86.506	0.151388	-7.24211
62.301	83.04	0.151388	-7.24211
64.201	82.61	0.151388	-7.24211
64.013	81.744	0.151388	-7.24211
54.578	81.01	0.151388	-7.24211
61.823	79.471	0.151388	-7.24211
54.747	79.277	0.151388	-7.24211
63.44	78.063	0.151388	-7.24211
58.176	77.101	0.151388	-7.24211
60.183	76.543	0.151388	-7.24211
63.07	74.95	0.151388	-7.24211
63.67	73.567	0.151388	-7.24211
60.033	72.443	0.151388	-7.24211
50.035	69.605	0.151388	-7.24211
73.695	67.361	0.151388	-7.24211
72.557	66.866	0.151388	-7.24211
70.594	65.606	0.151388	-7.24211
74.118	65.595	0.151388	-7.24211
67.17	65.57	0.151388	-7.24211
74.093	65.203	0.151388	-7.24211
68.817	64.363	0.151388	-7.24211
71.972	64.031	0.151388	-7.24211
75.035	62.045	0.151388	-7.24211
64.541	61.814	0.151388	-7.24211
74.932	61.667	0.151388	-7.24211
52.136	60.907	0.151388	-7.24211
74.589	60.196	0.151388	-7.24211
61.819	59.812	0.151388	-7.24211
64.38	58.734	0.151388	-7.24211
77.398	58.604	0.151388	-7.24211
73.223	58.551	0.151388	-7.24211
77.969	57.578	0.151388	-7.24211
71.858	55.625	0.151388	-7.24211
44.943	54.515	0.151388	-7.24211
72.835	54.306	0.151388	-7.24211
65.406	50.235	0.151388	-7.24211
73.85	49.842	0.151388	-7.24211
73.103	49.126	0.151388	-7.24211
79.132	48.91	0.151388	-7.24211
72.077	46.835	0.151388	-7.24211
76.488	44.13	0.151388	-7.24211
37.392	40.459	0.151388	-7.24211
31.485	39.315	0.151388	-7.24211
79.182	34.966	0.151388	-7.24211
72.681	34.695	0.151388	-7.24211
79.273	33.672	0.151388	-7.24211
67.969	29.352	0.151388	-7.24211
76.817	28.549	0.151388	-7.24211
33.505	25.296	0.151388	-7.24211
35.084	24.686	0.151388	-7.24211
59.13	22.429	0.151388	-7.24211
70.328	20.753	0.151388	-7.24211
77.688	18.446	0.151388	-7.24211
35.471	18.005	0.151388	-7.24211
73.55	17.385	0.151388	-7.24211
66.659	15.994	0.151388	-7.24211
65.087	14.912	0.151388	-7.24211
51.72	13.893	0.151388	-7.24211
53.783	12.13	0.151388	-7.24211
59.54	87.872	0.147123	-7.20088
63.677	86.293	0.147123	-7.20088
61.789	86.115	0.147123	-7.20088
62.47	83.655	0.147123	-7.20088
60.977	77.265	0.147123	-7.20088
49.109	75.629	0.147123	-7.20088
67.215	74.46	0.147123	-7.20088
60.893	72.694	0.147123	-7.20088
62.45	71.259	0.147123	-7.20088
67.412	70.694	0.147123	-7.20088
71.283	66.549	0.147123	-7.20088
46.257	65.992	0.147123	-7.20088
69.774	65.967	0.147123	-7.20088
72.362	56.177	0.147123	-7.20088
76.831	55.83	0.147123	-7.20088
72.397	53.402	0.147123	-7.20088
70.79	51.661	0.147123	-7.20088
79.554	47.788	0.147123	-7.20088
49.657	44.04	0.147123	-7.20088
68.4	42.527	0.147123	-7.20088
72.107	42.01	0.147123	-7.20088
73.597	42.023	0.147123	-7.20088
70.742	39.005	0.147123	-7.20088
54.946	38.043	0.147123	-7.20088
72.738	32.579	0.147123	-7.20088
72.905	31.115	0.147123	-7.20088
74.446	29.076	0.147123	-7.20088
54.665	26.513	0.147123	-7.20088
50.604	24.963	0.147123	-7.20088
28.332	17.032	0.147123	-7.20088
61.207	89.665	0.14273	-7.15714
57.225	87.691	0.14273	-7.15714
66.339	86.672	0.14273	-7.15714
62.404	86.508	0.14273	-7.15714
60.107	85.341	0.14273	-7.15714
58.746	84.458	0.14273	-7.15714
60.75	83.751	0.14273	-7.15714
56.47	83.35	0.14273	-7.15714
63.715	81.319	0.14273	-7.15714
59.002	77.577	0.14273	-7.15714
60.527	77.019	0.14273	-7.15714
66.926	70.997	0.14273	-7.15714
50.927	69.652	0.14273	-7.15714
61.229	69.257	0.14273	-7.15714
43.086	68.668	0.14273	-7.15714
73.616	66.885	0.14273	-7.15714
66.419	64.641	0.14273	-7.15714
66.6	64.085	0.14273	-7.15714
73.408	63.706	0.14273	-7.15714
40.646	60.815	0.14273	-7.15714
61.781	60.569	0.14273	-7.15714
75.983	59.444	0.14273	-7.15714
53.67	59.394	0.14273	-7.15714
77.114	57.621	0.14273	-7.15714
50.548	57.407	0.14273	-7.15714
45.73	57.297	0.14273	-7.15714
67.289	56.82	0.14273	-7.15714
59.259	54.914	0.14273	-7.15714
67.806	53.57	0.14273	-7.15714
71.406	53.113	0.14273	-7.15714
56.072	50.919	0.14273	-7.15714
67.867	50.172	0.14273	-7.15714
62.754	49.446	0.14273	-7.15714
78.239	45.711	0.14273	-7.15714
68.21	45.514	0.14273	-7.15714
63.513	45.069	0.14273	-7.15714
77.447	42.081	0.14273	-7.15714
70.615	41.343	0.14273	-7.15714
56.939	40.709	0.14273	-7.15714
71.146	39.5	0.14273	-7.15714
79.264	38.704	0.14273	-7.15714
78.093	38.46	0.14273	-7.15714
78.91	37.57	0.14273	-7.15714
75.169	34.156	0.14273	-7.15714
67.899	31.605	0.14273	-7.15714
76.758	31.379	0.14273	-7.15714
77.309	29.69	0.14273	-7.15714
38.758	26.224	0.14273	-7.15714
26.032	24.3	0.14273	-7.15714
26.717	23.084	0.14273	-7.15714
70.276	21.328	0.14273	-7.15714
35.931	20.85	0.14273	-7.15714
59.972	17.937	0.14273	-7.15714
76.578	17.531	0.14273	-7.15714
33.851	16.425	0.14273	-7.15714
58.544	14.7	0.14273	-7.15714
57.278	14.685	0.14273	-7.15714
62.552	13.062	0.14273	-7.15714
66.045	88.16	0.138198	-7.11059
66.071	86.781	0.138198	-7.11059
61.32	83.478	0.138198	-7.11059
62.445	81.047	0.138198	-7.11059
64.061	76.042	0.138198	-7.11059
48.299	74.582	0.138198	-7.11059
62.563	71.499	0.138198	-7.11059
60.641	70.107	0.138198	-7.11059
50.801	68.789	0.138198	-7.11059
49.244	67.26	0.138198	-7.11059
74.78	64.58	0.138198	-7.11059
61.308	62.075	0.138198	-7.11059
67.527	59.009	0.138198	-7.11059
75.871	58.698	0.138198	-7.11059
74.671	58.657	0.138198	-7.11059
54.661	58.412	0.138198	-7.11059
67.061	58.289	0.138198	-7.11059
71.357	58.019	0.138198	-7.11059
53.258	55.499	0.138198	-7.11059
77.861	53.981	0.138198	-7.11059
63.812	53.576	0.138198	-7.11059
78.685	49.202	0.138198	-7.11059
74.287	48.158	0.138198	-7.11059
59.236	47.949	0.138198	-7.11059
77.724	47.955	0.138198	-7.11059
76.387	47.735	0.138198	-7.11059
69.941	47.389	0.138198	-7.11059
75.252	38.971	0.138198	-7.11059
65.571	37.915	0.138198	-7.11059
78.954	36.784	0.138198	-7.11059
71.946	36.525	0.138198	-7.11059
75.815	33.356	0.138198	-7.11059
21.778	27.088	0.138198	-7.11059
77.979	26.488	0.138198	-7.11059
47.304	24.876	0.138198	-7.11059
22.073	22.939	0.138198	-7.11059
44.009	11.345	0.138198	-7.11059
47.881	11.027	0.138198	-7.11059
55.447	9.149	0.138198	-7.11059
51.834	8.357	0.138198	-7.11059
63.904	95.964	0.133512	-7.06082
60.441	91.745	0.133512	-7.06082
65.625	91.087	0.133512	-7.06082
60.139	90.171	0.133512	-7.06082
65.473	88.823	0.133512	-7.06082
67.089	88.582	0.133512	-7.06082
54.482	83.059	0.133512	-7.06082
52.644	79.454	0.133512	-7.06082
53.316	79.294	0.133512	-7.06082
59.453	76.634	0.133512	-7.06082
65.372	75.785	0.133512	-7.06082
60.689	74.716	0.133512	-7.06082
69.186	74.344	0.133512	-7.06082
64.798	72.107	0.133512	-7.06082
54.351	70.326	0.133512	-7.06082
60.337	69.752	0.133512	-7.06082
70.099	69.488	0.133512	-7.06082
65.212	69.096	0.133512	-7.06082
66.401	68.437	0.133512	-7.06082
61.864	67.881	0.133512	-7.06082
45.124	67.674	0.133512	-7.06082
64.966	66.424	0.133512	-7.06082
69.608	65.176	0.133512	-7.06082
74.873	65.088	0.133512	-7.06082
67.708	64.905	0.133512	-7.06082
62.076	61.793	0.133512	-7.06082
75.349	59.379	0.133512	-7.06082
72.071	58.993	0.133512	-7.06082
55.634	57.662	0.133512	-7.06082
58.877	56.623	0.133512	-7.06082
63.125	55.326	0.133512	-7.06082
58.98	55.224	0.133512	-7.06082
36.482	54.839	0.133512	-7.06082
64.496	52.777	0.133512	-7.06082
77.047	52.425	0.133512	-7.06082
46.422	52.272	0.133512	-7.06082
70.984	51.203	0.133512	-7.06082
67.579	51.065	0.133512	-7.06082
76.556	49.097	0.133512	-7.06082
70.822	47.793	0.133512	-7.06082
77.452	47.219	0.133512	-7.06082
41.911	46.167	0.133512	-7.06082
72.107	45.498	0.133512	-7.06082
49.331	45.335	0.133512	-7.06082
63.031	44.071	0.133512	-7.06082
57.741	43.948	0.133512	-7.06082
75.611	43.484	0.133512	-7.06082
54.324	42.298	0.133512	-7.06082
74.084	41.01	0.133512	-7.06082
78.96	40.314	0.133512	-7.06082
77.096	37.643	0.133512	-7.06082
76.851	35.952	0.133512	-7.06082
77.321	33.781	0.133512	-7.06082
64.481	33.689	0.133512	-7.06082
59.702	32.516	0.133512	-7.06082
63.275	30.761	0.133512	-7.06082
72.658	28.647	0.133512	-7.06082
73.562	26.404	0.133512	-7.06082
67.075	26.335	0.133512	-7.06082
26.538	26.091	0.133512	-7.06082
78.066	25.263	0.133512	-7.06082
66.641	24.991	0.133512	-7.06082
70.809	20.334	0.133512	-7.06082
47.295	19.505	0.133512	-7.06082
30.064	18.832	0.133512	-7.06082
28.501	18.418	0.133512	-7.06082
75.762	16.704	0.133512	-7.06082
41.253	15.612	0.133512	-7.06082
60.235	13.636	0.133512	-7.06082
33.075	12.57	0.133512	-7.06082
64.436	12.327	0.133512	-7.06082
62.318	91.975	0.128655	-7.00736
65.489	90.352	0.128655	-7.00736
64.536	90.313	0.128655	-7.00736
66.445	88.908	0.128655	-7.00736
67.375	88.841	0.128655	-7.00736
62.092	84.979	0.128655	-7.00736
53.454	81.622	0.128655	-7.00736
68.826	73.203	0.128655	-7.00736
73.774	65.438	0.128655	-7.00736
55.172	64.275	0.128655	-7.00736
73.22	60.371	0.128655	-7.00736
76.446	60.073	0.128655	-7.00736
41.411	58.471	0.128655	-7.00736
58.742	56.918	0.128655	-7.00736
65.568	56.742	0.128655	-7.00736
39.104	55.853	0.128655	-7.00736
67.431	53.627	0.128655	-7.00736
73.061	52.815	0.128655	-7.00736
67.215	51.609	0.128655	-7.00736
58.671	51.412	0.128655	-7.00736
78.414	50.537	0.128655	-7.00736
48.129	49.51	0.128655	-7.00736
72.802	47.475	0.128655	-7.00736
79.251	45.972	0.128655	-7.00736
73.504	39.357	0.128655	-7.00736
45.209	39.127	0.128655	-7.00736
56.623	38.386	0.128655	-7.00736
28.655	37.664	0.128655	-7.00736
78.776	36.323	0.128655	-7.00736
79.527	35.49	0.128655	-7.00736
35.976	31.253	0.128655	-7.00736
48.306	25.814	0.128655	-7.00736
54.733	21.577	0.128655	-7.00736
65.502	20.712	0.128655	-7.00736
61.639	18.01	0.128655	-7.00736
68.495	17.139	0.128655	-7.00736
75.541	15.622	0.128655	-7.00736
68.426	14.883	0.128655	-7.00736
68.531	14.501	0.128655	-7.00736
54.769	12.688	0.128655	-7.00736
50.791	10.612	0.128655	-7.00736
63.651	93.854	0.123608	-6.94963
61.95	91.607	0.123608	-6.94963
60.984	89.441	0.123608	-6.94963
58.082	89.173	0.123608	-6.94963
60.019	89.109	0.123608	-6.94963
66.709	88.955	0.123608	-6.94963
57.751	86.911	0.123608	-6.94963
64.165	85.454	0.123608	-6.94963
64.484	84.54	0.123608	-6.94963
65.242	83.669	0.123608	-6.94963
63.185	78.511	0.123608	-6.94963
62.183	78.371	0.123608	-6.94963
63.258	76.996	0.123608	-6.94963
66.72	75.985	0.123608	-6.94963
61.422	75.38	0.123608	-6.94963
48.718	75.378	0.123608	-6.94963
69.009	75.152	0.123608	-6.94963
58.754	72.716	0.123608	-6.94963
52.754	71.95	0.123608	-6.94963
60.586	71.276	0.123608	-6.94963
57.625	68.357	0.123608	-6.94963
70.051	68.237	0.123608	-6.94963
71.391	67.297	0.123608	-6.94963
70.354	66.713	0.123608	-6.94963
65.586	66.693	0.123608	-6.94963
65.364	64.925	0.123608	-6.94963
72.257	64.441	0.123608	-6.94963
67.491	64.355	0.123608	-6.94963
45.713	63.509	0.123608	-6.94963
72.167	63.436	0.123608	-6.94963
64.295	63.099	0.123608	-6.94963
76.357	61.2	0.123608	-6.94963
74.733	60.291	0.123608	-6.94963
58.153	59.31	0.123608	-6.94963
47.21	58.77	0.123608	-6.94963
74.252	57.585	0.123608	-6.94963
74.749	57.556	0.123608	-6.94963
77.068	57.227	0.123608	-6.94963
62.446	55.191	0.123608	-6.94963
71.087	55.178	0.123608	-6.94963
66.62	55.095	0.123608	-6.94963
69.982	52.176	0.123608	-6.94963
71.54	47.016	0.123608	-6.94963
79.631	46.445	0.123608	-6.94963
77.559	44.416	0.123608	-6.94963
66.844	43.887	0.123608	-6.94963
55.69	42.35	0.123608	-6.94963
36.452	42.214	0.123608	-6.94963
32.407	41.492	0.123608	-6.94963
27.692	37.964	0.123608	-6.94963
75.681	36.041	0.123608	-6.94963
76.704	31.658	0.123608	-6.94963
75.862	28.553	0.123608	-6.94963
75.366	27.677	0.123608	-6.94963
57.675	24.221	0.123608	-6.94963
78.098	24.178	0.123608	-6.94963
77.756	22.607	0.123608	-6.94963
34.827	21.767	0.123608	-6.94963
36.424	21.675	0.123608	-6.94963
59.286	21.479	0.123608	-6.94963
68.792	20.575	0.123608	-6.94963
32.827	20.467	0.123608	-6.94963
72.262	16.329	0.123608	-6.94963
61.322	15.65	0.123608	-6.94963
32.973	14.902	0.123608	-6.94963
28.886	13.711	0.123608	-6.94963
66.619	13.614	0.123608	-6.94963
66.094	13.272	0.123608	-6.94963
52.569	13.258	0.123608	-6.94963
53.159	12.812	0.123608	-6.94963
61.164	12.653	0.123608	-6.94963
65.785	12.328	0.123608	-6.94963
59.386	12.109	0.123608	-6.94963
36.771	11.785	0.123608	-6.94963
53.456	8.585	0.123608	-6.94963
64.131	84.495	0.118345	-6.88686
55.46	84.171	0.118345	-6.88686
61.294	81.294	0.118345	-6.88686
61.849	78.861	0.118345	-6.88686
62.411	77.659	0.118345	-6.88686
49.489	76.397	0.118345	-6.88686
65.923	75.95	0.118345	-6.88686
68.666	75.764	0.118345	-6.88686
64.787	75.623	0.118345	-6.88686
66.674	73.242	0.118345	-6.88686
60.061	72.105	0.118345	-6.88686
60.67	71.59	0.118345	-6.88686
63.412	71.476	0.118345	-6.88686
58.04	70.033	0.118345	-6.88686
57.682	68.055	0.118345	-6.88686
54.921	67.976	0.118345	-6.88686
67.689	65.878	0.118345	-6.88686
64.231	65.156	0.118345	-6.88686
70.747	64.591	0.118345	-6.88686
68	63.89	0.118345	-6.88686
54.916	63.825	0.118345	-6.88686
72.389	62.818	0.118345	-6.88686
67.991	61.858	0.118345	-6.88686
66.48	61.84	0.118345	-6.88686
65.275	61.198	0.118345	-6.88686
76.831	60.594	0.118345	-6.88686
50.948	58.87	0.118345	-6.88686
76.134	57.244	0.118345	-6.88686
62.632	56.271	0.118345	-6.88686
46.437	56.154	0.118345	-6.88686
76.849	53.788	0.118345	-6.88686
40.961	53.268	0.118345	-6.88686
49.294	53.146	0.118345	-6.88686
73.416	51.261	0.118345	-6.88686
78.286	50.246	0.118345	-6.88686
76.481	49.56	0.118345	-6.88686
39.894	49.114	0.118345	-6.88686
78.84	48.63	0.118345	-6.88686
49.646	47.035	0.118345	-6.88686
68.98	45.903	0.118345	-6.88686
70.211	43.378	0.118345	-6.88686
78.701	42.553	0.118345	-6.88686
78.153	41.053	0.118345	-6.88686
71.02	40.48	0.118345	-6.88686
73.239	40.164	0.118345	-6.88686
70.05	35.667	0.118345	-6.88686
73.37	31.54	0.118345	-6.88686
76.407	26.24	0.118345	-6.88686
63.045	25.917	0.118345	-6.88686
53.254	17.429	0.118345	-6.88686
71.403	17.084	0.118345	-6.88686
28.154	15.384	0.118345	-6.88686
25.697	15.279	0.118345	-6.88686
35.986	15.1	0.118345	-6.88686
25.416	14.891	0.118345	-6.88686
60.798	14.077	0.118345	-6.88686
32.676	13.163	0.118345	-6.88686
50.832	12.06	0.118345	-6.88686
44.684	10.772	0.118345	-6.88686
64.93	95.929	0.112838	-6.81811
62.319	93.087	0.112838	-6.81811
59.579	89.308	0.112838	-6.81811
63.29	88.36	0.112838	-6.81811
64.191	86.496	0.112838	-6.81811
59.517	86.023	0.112838	-6.81811
64.714	85.519	0.112838	-6.81811
62.405	84.261	0.112838	-6.81811
60.372	84.163	0.112838	-6.81811
63.841	83.518	0.112838	-6.81811
63.52	76.83	0.112838	-6.81811
67.63	76.7	0.112838	-6.81811
54.831	76.558	0.112838	-6.81811
64.522	76.396	0.112838	-6.81811
68.373	76.203	0.112838	-6.81811
57.454	76.054	0.112838	-6.81811
59.382	75.715	0.112838	-6.81811
62.333	75.23	0.112838	-6.81811
57.601	74.581	0.112838	-6.81811
57.492	74.037	0.112838	-6.81811
53.968	72.328	0.112838	-6.81811
57.981	71.892	0.112838	-6.81811
62.992	71.385	0.112838	-6.81811
42.801	68.543	0.112838	-6.81811
54.629	66.955	0.112838	-6.81811
71.473	65.178	0.112838	-6.81811
72.341	64.696	0.112838	-6.81811
42.804	64.072	0.112838	-6.81811
40.528	63.618	0.112838	-6.81811
71.924	62.764	0.112838	-6.81811
76.391	61.763	0.112838	-6.81811
67.644	61.533	0.112838	-6.81811
71.576	59.523	0.112838	-6.81811
39.077	59.415	0.112838	-6.81811
64.88	56.654	0.112838	-6.81811
66.64	56.65	0.112838	-6.81811
65.814	56.401	0.112838	-6.81811
71.913	55.969	0.112838	-6.81811
38.063	55.596	0.112838	-6.81811
66.941	55.372	0.112838	-6.81811
65.627	54.646	0.112838	-6.81811
67.898	53.96	0.112838	-6.81811
68.831	53.015	0.112838	-6.81811
34.908	50.93	0.112838	-6.81811
64.629	50.904	0.112838	-6.81811
41.238	48.799	0.112838	-6.81811
73.722	47.989	0.112838	-6.81811
75.336	47.707	0.112838	-6.81811
59.178	47.382	0.112838	-6.81811
67.57	47	0.112838	-6.81811
74.693	46.865	0.112838	-6.81811
30.051	46.24	0.112838	-6.81811
76.375	46.252	0.112838	-6.81811
77.143	45.612	0.112838	-6.81811
77.631	45.296	0.112838	-6.81811
73.043	44.762	0.112838	-6.81811
78.098	43.408	0.112838	-6.81811
71.023	42.959	0.112838	-6.81811
40.966	40.937	0.112838	-6.81811
67.348	40.727	0.112838	-6.81811
29.148	40.656	0.112838	-6.81811
58.183	39.914	0.112838	-6.81811
69.984	39.198	0.112838	-6.81811
78.534	38.028	0.112838	-6.81811
56.969	37.335	0.112838	-6.81811
58.516	35.623	0.112838	-6.81811
25.483	34.435	0.112838	-6.81811
75.811	33.875	0.112838	-6.81811
72.576	33.052	0.112838	-6.81811
60.287	26.487	0.112838	-6.81811
76.834	24.406	0.112838	-6.81811
31.992	24.195	0.112838	-6.81811
22.505	24.023	0.112838	-6.81811
64.588	22.656	0.112838	-6.81811
73.043	19.442	0.112838	-6.81811
64.707	18.531	0.112838	-6.81811
28.262	18.377	0.112838	-6.81811
73.7	18.224	0.112838	-6.81811
49.584	18.196	0.112838	-6.81811
74.578	18.03	0.112838	-6.81811
57.1	17.44	0.112838	-6.81811
55.724	15.34	0.112838	-6.81811
52.852	13.148	0.112838	-6.81811
43.027	13.036	0.112838	-6.81811
41.379	12.836	0.112838	-6.81811
54.046	12.08	0.112838	-6.81811
54.247	11.771	0.112838	-6.81811
59.336	10.968	0.112838	-6.81811
43.125	10.191	0.112838	-6.81811
65.329	91.893	0.107047	-6.74211
59.317	89.883	0.107047	-6.74211
66.047	88.965	0.107047	-6.74211
62.518	88.27	0.107047	-6.74211
62.572	86.711	0.107047	-6.74211
56.892	84.481	0.107047	-6.74211
59.674	84.105	0.107047	-6.74211
65.115	83.309	0.107047	-6.74211
60.543	82.364	0.107047	-6.74211
53.449	82.142	0.107047	-6.74211
52.65	80.296	0.107047	-6.74211
63.283	80.055	0.107047	-6.74211
62.074	79.418	0.107047	-6.74211
62.344	79.366	0.107047	-6.74211
61.298	78.555	0.107047	-6.74211
68.197	77.483	0.107047	-6.74211
57.291	76.406	0.107047	-6.74211
67.625	76.384	0.107047	-6.74211
65.068	72.499	0.107047	-6.74211
57.501	71.542	0.107047	-6.74211
57.165	70.694	0.107047	-6.74211
58.674	70.576	0.107047	-6.74211
66.359	70.402	0.107047	-6.74211
56.736	67.033	0.107047	-6.74211
74.146	66.608	0.107047	-6.74211
52.904	66.204	0.107047	-6.74211
64.708	65.792	0.107047	-6.74211
74.035	64.359	0.107047	-6.74211
73.284	63.243	0.107047	-6.74211
61.739	62.973	0.107047	-6.74211
66.339	62.665	0.107047	-6.74211
72.61	62.047	0.107047	-6.74211
64.83	60.89	0.107047	-6.74211
75.236	60.843	0.107047	-6.74211
74.255	60.195	0.107047	-6.74211
74.398	59.592	0.107047	-6.74211
72.988	59.241	0.107047	-6.74211
50.871	58.038	0.107047	-6.74211
75.634	56.787	0.107047	-6.74211
72.203	55.874	0.107047	-6.74211
56.461	55.682	0.107047	-6.74211
69.137	53.79	0.107047	-6.74211
53.959	52.175	0.107047	-6.74211
76.808	51.522	0.107047	-6.74211
73.195	51.296	0.107047	-6.74211
74.075	50.821	0.107047	-6.74211
75.232	50.198	0.107047	-6.74211
73.522	49.814	0.107047	-6.74211
75.327	49.083	0.107047	-6.74211
76.4	47.49	0.107047	-6.74211
74.075	46.813	0.107047	-6.74211
65.326	45.382	0.107047	-6.74211
70.773	42.678	0.107047	-6.74211
75.075	42.069	0.107047	-6.74211
52.058	40.701	0.107047	-6.74211
69.021	40.327	0.107047	-6.74211
73.054	39.522	0.107047	-6.74211
67.768	38.48	0.107047	-6.74211
69.075	37.398	0.107047	-6.74211
78.224	36.866	0.107047	-6.74211
78.71	34.827	0.107047	-6.74211
75.119	34.802	0.107047	-6.74211
73.064	31.9	0.107047	-6.74211
38.048	30.711	0.107047	-6.74211
64.665	30.32	0.107047	-6.74211
62.042	28.602	0.107047	-6.74211
54.229	26.904	0.107047	-6.74211
67.094	25.162	0.107047	-6.74211
28.022	16.919	0.107047	-6.74211
51.15	16.29	0.107047	-6.74211
30.433	15.935	0.107047	-6.74211
47.238	15.166	0.107047	-6.74211
41.147	13.662	0.107047	-6.74211
59.561	12.362	0.107047	-6.74211
50.253	9.982	0.107047	-6.74211
63.703	96.144	0.100925	-6.65714
64.993	94.412	0.100925	-6.65714
63.544	92.331	0.100925	-6.65714
60.778	90.632	0.100925	-6.65714
64.548	89.258	0.100925	-6.65714
58.494	89.153	0.100925	-6.65714
59.612	88.35	0.100925	-6.65714
66.535	85.795	0.100925	-6.65714
62.667	83.71	0.100925	-6.65714
64.327	82.197	0.100925	-6.65714
68.182	78.524	0.100925	-6.65714
64.372	78.378	0.100925	-6.65714
64.578	78.009	0.100925	-6.65714
62.977	77.806	0.100925	-6.65714
62.231	77.497	0.100925	-6.65714
60.225	76.179	0.100925	-6.65714
61.639	75.597	0.100925	-6.65714
60.028	75.565	0.100925	-6.65714
60.579	75.189	0.100925	-6.65714
68.845	74.997	0.100925	-6.65714
66.87	72.98	0.100925	-6.65714
68.77	72.86	0.100925	-6.65714
68.302	71.998	0.100925	-6.65714
61.681	67.578	0.100925	-6.65714
68.85	67.261	0.100925	-6.65714
74.677	64.989	0.100925	-6.65714
75.35	64.111	0.100925	-6.65714
73.469	63.896	0.100925	-6.65714
73.567	62.163	0.100925	-6.65714
68.624	60.621	0.100925	-6.65714
75.199	60.515	0.100925	-6.65714
50.315	60.433	0.100925	-6.65714
67.593	58.667	0.100925	-6.65714
68.563	57.886	0.100925	-6.65714
74.764	56.762	0.100925	-6.65714
78.643	56.607	0.100925	-6.65714
64.114	54.972	0.100925	-6.65714
73.745	52.373	0.100925	-6.65714
74.816	50.247	0.100925	-6.65714
67.386	49.967	0.100925	-6.65714
60.02	49.836	0.100925	-6.65714
75.804	49.633	0.100925	-6.65714
78.342	48.535	0.100925	-6.65714
76.791	47.922	0.100925	-6.65714
62.272	47.806	0.100925	-6.65714
74.8	47.22	0.100925	-6.65714
69.582	46.392	0.100925	-6.65714
74.238	46.111	0.100925	-6.65714
70.987	45.559	0.100925	-6.65714
59.163	45.179	0.100925	-6.65714
74.044	45.142	0.100925	-6.65714
78.806	44.191	0.100925	-6.65714
70.598	42.716	0.100925	-6.65714
76.118	41.962	0.100925	-6.65714
75.457	41.519	0.100925	-6.65714
73.531	41.316	0.100925	-6.65714
72.857	40.9	0.100925	-6.65714
72.521	40.82	0.100925	-6.65714
68.17	40.735	0.100925	-6.65714
68.961	40.742	0.100925	-6.65714
76.788	40.168	0.100925	-6.65714
45.639	39.375	0.100925	-6.65714
76.799	39.096	0.100925	-6.65714
35.351	37.905	0.100925	-6.65714
70.372	33.951	0.100925	-6.65714
39.615	30.421	0.100925	-6.65714
61.113	28.833	0.100925	-6.65714
59.846	26.593	0.100925	-6.65714
66.135	26.271	0.100925	-6.65714
34.448	26.022	0.100925	-6.65714
64.26	24.513	0.100925	-6.65714
36.821	23.509	0.100925	-6.65714
21.896	22.695	0.100925	-6.65714
72.629	22.634	0.100925	-6.65714
74.722	21.072	0.100925	-6.65714
49.372	21.022	0.100925	-6.65714
54.935	20.459	0.100925	-6.65714
37.701	20.133	0.100925	-6.65714
39.039	19.158	0.100925	-6.65714
69.546	18.448	0.100925	-6.65714
77.041	17.878	0.100925	-6.65714
65.398	17.504	0.100925	-6.65714
25.881	17.247	0.100925	-6.65714
28.84	16.031	0.100925	-6.65714
62.198	15.985	0.100925	-6.65714
66.26	14.71	0.100925	-6.65714
69.761	14.266	0.100925	-6.65714
62.133	14.203	0.100925	-6.65714
54.622	13.535	0.100925	-6.65714
33.364	13.087	0.100925	-6.65714
65.361	12.702	0.100925	-6.65714
57.417	11.338	0.100925	-6.65714
61.282	11.275	0.100925	-6.65714
57.918	11.122	0.100925	-6.65714
49.822	10.356	0.100925	-6.65714
64.799	95.176	0.094407	-6.56082
61.038	91.944	0.094407	-6.56082
66.35	90.77	0.094407	-6.56082
63.697	90.43	0.094407	-6.56082
62.15	89.896	0.094407	-6.56082
64.758	87.56	0.094407	-6.56082
64.541	87.348	0.094407	-6.56082
57.657	86.71	0.094407	-6.56082
55.992	84.791	0.094407	-6.56082
61.019	84.401	0.094407	-6.56082
54.735	83.345	0.094407	-6.56082
57.626	83.317	0.094407	-6.56082
60.147	80.523	0.094407	-6.56082
51.824	79.544	0.094407	-6.56082
61.262	78.843	0.094407	-6.56082
50.94	78.79	0.094407	-6.56082
62.467	78.617	0.094407	-6.56082
49.842	78.527	0.094407	-6.56082
60.29	78.48	0.094407	-6.56082
65.659	77.274	0.094407	-6.56082
59.635	77.214	0.094407	-6.56082
68.026	76.876	0.094407	-6.56082
50.522	75.623	0.094407	-6.56082
63.651	75.053	0.094407	-6.56082
52.802	74.372	0.094407	-6.56082
66.932	73.166	0.094407	-6.56082
47.541	71.617	0.094407	-6.56082
48.389	70.217	0.094407	-6.56082
71.234	65.098	0.094407	-6.56082
54.782	64.689	0.094407	-6.56082
42.41	64.171	0.094407	-6.56082
46.729	64.043	0.094407	-6.56082
72.244	63.969	0.094407	-6.56082
65.746	61.382	0.094407	-6.56082
70.473	60.423	0.094407	-6.56082
40.886	59.682	0.094407	-6.56082
66.67	59.372	0.094407	-6.56082
62.281	57.126	0.094407	-6.56082
59.757	57.017	0.094407	-6.56082
69.143	55.41	0.094407	-6.56082
76.797	54.861	0.094407	-6.56082
59.504	52.308	0.094407	-6.56082
77.59	49.159	0.094407	-6.56082
79.159	48.108	0.094407	-6.56082
39.415	47.682	0.094407	-6.56082
67.372	45.564	0.094407	-6.56082
77.62	43.366	0.094407	-6.56082
76.268	42.939	0.094407	-6.56082
76.71	42.666	0.094407	-6.56082
66.552	42.078	0.094407	-6.56082
68.059	41.624	0.094407	-6.56082
79.652	41.29	0.094407	-6.56082
59.387	40.944	0.094407	-6.56082
76.8	40.65	0.094407	-6.56082
66.902	39.227	0.094407	-6.56082
77.289	35.226	0.094407	-6.56082
79.352	34.812	0.094407	-6.56082
63.652	34.539	0.094407	-6.56082
77.559	34.509	0.094407	-6.56082
77.556	34.068	0.094407	-6.56082
73.53	33.397	0.094407	-6.56082
74.343	31.782	0.094407	-6.56082
79.094	31.359	0.094407	-6.56082
76.229	27.997	0.094407	-6.56082
55.697	26.853	0.094407	-6.56082
60.578	25.828	0.094407	-6.56082
66.791	25.768	0.094407	-6.56082
73.102	24.112	0.094407	-6.56082
21.441	23.952	0.094407	-6.56082
58.286	18.463	0.094407	-6.56082
77.291	18.283	0.094407	-6.56082
75.949	18.048	0.094407	-6.56082
48.438	16.991	0.094407	-6.56082
72.405	14.789	0.094407	-6.56082
63.754	14.621	0.094407	-6.56082
50.901	13.055	0.094407	-6.56082
66.826	12.786	0.094407	-6.56082
61.894	11.514	0.094407	-6.56082
43.829	11.236	0.094407	-6.56082
45.074	9.859	0.094407	-6.56082
63.571	95.726	0.0874039	-6.44963
60.823	91.438	0.0874039	-6.44963
59.528	91.055	0.0874039	-6.44963
65.734	90.75	0.0874039	-6.44963
64.938	88.966	0.0874039	-6.44963
57.385	88.329	0.0874039	-6.44963
63.911	88.256	0.0874039	-6.44963
65.197	87.639	0.0874039	-6.44963
55.123	82.574	0.0874039	-6.44963
51.61	81.16	0.0874039	-6.44963
58.484	78.954	0.0874039	-6.44963
64.22	78.293	0.0874039	-6.44963
66.003	78.206	0.0874039	-6.44963
49.775	77.991	0.0874039	-6.44963
59.309	77.577	0.0874039	-6.44963
66.674	77.254	0.0874039	-6.44963
67.101	76.648	0.0874039	-6.44963
60.942	76.569	0.0874039	-6.44963
68.722	76.462	0.0874039	-6.44963
67.57	75.18	0.0874039	-6.44963
62.19	73.56	0.0874039	-6.44963
68.29	73.12	0.0874039	-6.44963
64.59	72.76	0.0874039	-6.44963
58.682	72.469	0.0874039	-6.44963
64.089	71.473	0.0874039	-6.44963
62.736	71.332	0.0874039	-6.44963
47.64	70.166	0.0874039	-6.44963
68.961	66.927	0.0874039	-6.44963
74.558	65.861	0.0874039	-6.44963
41.98	63.38	0.0874039	-6.44963
51.882	62.537	0.0874039	-6.44963
60.089	62.427	0.0874039	-6.44963
66.076	62.23	0.0874039	-6.44963
72.022	62.091	0.0874039	-6.44963
39.827	61.819	0.0874039	-6.44963
70.363	61.704	0.0874039	-6.44963
72.061	61.557	0.0874039	-6.44963
72.409	61.287	0.0874039	-6.44963
74.344	61.286	0.0874039	-6.44963
73.994	61.101	0.0874039	-6.44963
51.679	59.926	0.0874039	-6.44963
75.557	59.586	0.0874039	-6.44963
74.494	59.244	0.0874039	-6.44963
68.802	58.678	0.0874039	-6.44963
73.477	58.367	0.0874039	-6.44963
60.806	57.967	0.0874039	-6.44963
55.931	57.257	0.0874039	-6.44963
77.404	55.834	0.0874039	-6.44963
70.519	55.68	0.0874039	-6.44963
77.661	53.875	0.0874039	-6.44963
75.713	52.434	0.0874039	-6.44963
39.34	52.42	0.0874039	-6.44963
49.569	52.073	0.0874039	-6.44963
75.336	51.28	0.0874039	-6.44963
52.567	50.789	0.0874039	-6.44963
79.418	49.407	0.0874039	-6.44963
77.611	48.154	0.0874039	-6.44963
62.477	48.108	0.0874039	-6.44963
44.998	47.406	0.0874039	-6.44963
68.58	47.189	0.0874039	-6.44963
43.446	47.006	0.0874039	-6.44963
63.526	46.827	0.0874039	-6.44963
73.626	46.05	0.0874039	-6.44963
67.437	46.041	0.0874039	-6.44963
73.009	45.727	0.0874039	-6.44963
66.391	44.966	0.0874039	-6.44963
31.494	42.737	0.0874039	-6.44963
70.718	42.349	0.0874039	-6.44963
77.83	41.66	0.0874039	-6.44963
71.976	41.16	0.0874039	-6.44963
69.4	40.736	0.0874039	-6.44963
72.022	39.898	0.0874039	-6.44963
60.282	38.844	0.0874039	-6.44963
53.217	37.896	0.0874039	-6.44963
65.837	37.799	0.0874039	-6.44963
56.8	37.08	0.0874039	-6.44963
74.884	36.994	0.0874039	-6.44963
77.822	36.338	0.0874039	-6.44963
65.986	35.389	0.0874039	-6.44963
75.776	34.843	0.0874039	-6.44963
51.124	34.249	0.0874039	-6.44963
76.511	33.698	0.0874039	-6.44963
76.098	33.511	0.0874039	-6.44963
60.814	32.731	0.0874039	-6.44963
56.271	32.224	0.0874039	-6.44963
50.582	31.009	0.0874039	-6.44963
59.109	29.765	0.0874039	-6.44963
70.83	28.579	0.0874039	-6.44963
37.659	27.811	0.0874039	-6.44963
36.65	26.33	0.0874039	-6.44963
78.131	26.142	0.0874039	-6.44963
24.88	25.781	0.0874039	-6.44963
75.561	24.878	0.0874039	-6.44963
68.322	24.618	0.0874039	-6.44963
33.114	22.071	0.0874039	-6.44963
74.327	21.158	0.0874039	-6.44963
35.327	19.929	0.0874039	-6.44963
73.38	19.91	0.0874039	-6.44963
60.615	17.919	0.0874039	-6.44963
26.352	16.69	0.0874039	-6.44963
63.06	16.344	0.0874039	-6.44963
46.678	15.962	0.0874039	-6.44963
62.255	15.48	0.0874039	-6.44963
72.057	15.499	0.0874039	-6.44963
68.037	14.722	0.0874039	-6.44963
29.278	14.699	0.0874039	-6.44963
39.357	14.719	0.0874039	-6.44963
69.636	14.209	0.0874039	-6.44963
56.281	12.871	0.0874039	-6.44963
61.911	12.447	0.0874039	-6.44963
65.029	12.084	0.0874039	-6.44963
52.864	10.986	0.0874039	-6.44963
65.133	94.75	0.0797885	-6.31811
62.682	92.182	0.0797885	-6.31811
61.248	91.133	0.0797885	-6.31811
65.92	90.66	0.0797885	-6.31811
59.847	90.57	0.0797885	-6.31811
64.488	90.057	0.0797885	-6.31811
67.136	86.878	0.0797885	-6.31811
66.767	86.559	0.0797885	-6.31811
57.968	86.458	0.0797885	-6.31811
63.567	84.655	0.0797885	-6.31811
63.27	83.984	0.0797885	-6.31811
62.587	82.858	0.0797885	-6.31811
62.785	82.618	0.0797885	-6.31811
58.312	80.087	0.0797885	-6.31811
60.858	79.133	0.0797885	-6.31811
63.918	78.418	0.0797885	-6.31811
67.955	78.42	0.0797885	-6.31811
63.808	78.308	0.0797885	-6.31811
58.52	77	0.0797885	-6.31811
57.675	75.972	0.0797885	-6.31811
68.36	75.88	0.0797885	-6.31811
58.913	75.582	0.0797885	-6.31811
69.082	74.462	0.0797885	-6.31811
62.492	74.227	0.0797885	-6.31811
59.963	73.837	0.0797885	-6.31811
67.932	73.696	0.0797885	-6.31811
54.392	72.684	0.0797885	-6.31811
63.69	72.147	0.0797885	-6.31811
57.483	70.865	0.0797885	-6.31811
53.41	70.53	0.0797885	-6.31811
67.521	70.464	0.0797885	-6.31811
73.502	68.418	0.0797885	-6.31811
73.963	67.855	0.0797885	-6.31811
72.825	66.507	0.0797885	-6.31811
70.268	65.733	0.0797885	-6.31811
74.358	65.682	0.0797885	-6.31811
63.39	64.67	0.0797885	-6.31811
75.003	63.103	0.0797885	-6.31811
69.127	62.39	0.0797885	-6.31811
74.037	62.227	0.0797885	-6.31811
57.152	61.313	0.0797885	-6.31811
73.75	61.015	0.0797885	-6.31811
74.384	60.922	0.0797885	-6.31811
39.573	60.493	0.0797885	-6.31811
67.51	60	0.0797885	-6.31811
70.163	59.412	0.0797885	-6.31811
76.048	57.428	0.0797885	-6.31811
61.898	56.859	0.0797885	-6.31811
71.47	56.65	0.0797885	-6.31811
53.822	56.398	0.0797885	-6.31811
63.91	55.08	0.0797885	-6.31811
66.11	55.01	0.0797885	-6.31811
64.595	53.882	0.0797885	-6.31811
51.793	52.638	0.0797885	-6.31811
72.582	52.387	0.0797885	-6.31811
77.983	52.333	0.0797885	-6.31811
46.073	52.03	0.0797885	-6.31811
71.803	51.27	0.0797885	-6.31811
71.975	50.285	0.0797885	-6.31811
57.815	50.061	0.0797885	-6.31811
51.07	49.52	0.0797885	-6.31811
71.69	48.18	0.0797885	-6.31811
33.085	47.982	0.0797885	-6.31811
40.168	47.953	0.0797885	-6.31811
76.77	47.184	0.0797885	-6.31811
65.725	45.958	0.0797885	-6.31811
70.572	45.733	0.0797885	-6.31811
50.235	44.912	0.0797885	-6.31811
48.201	44.836	0.0797885	-6.31811
61.152	44.873	0.0797885	-6.31811
76.443	43.468	0.0797885	-6.31811
73.436	42.276	0.0797885	-6.31811
73.6	41.06	0.0797885	-6.31811
69.321	40.327	0.0797885	-6.31811
51.424	40.33	0.0797885	-6.31811
71.878	39.778	0.0797885	-6.31811
75.927	39.185	0.0797885	-6.31811
71.373	36.862	0.0797885	-6.31811
68.697	35.36	0.0797885	-6.31811
74.598	34.175	0.0797885	-6.31811
66.518	32.495	0.0797885	-6.31811
78.998	32.019	0.0797885	-6.31811
54.728	29.163	0.0797885	-6.31811
50.707	27.392	0.0797885	-6.31811
63.395	24.29	0.0797885	-6.31811
46.365	21.382	0.0797885	-6.31811
31.39	20.318	0.0797885	-6.31811
66.49	20.207	0.0797885	-6.31811
68.488	17.592	0.0797885	-6.31811
70.93	17.238	0.0797885	-6.31811
76.285	16.355	0.0797885	-6.31811
74.852	15.292	0.0797885	-6.31811
36.567	14.138	0.0797885	-6.31811
32.25	14.013	0.0797885	-6.31811
42.898	13.258	0.0797885	-6.31811
64.068	11.862	0.0797885	-6.31811
40.85	11.19	0.0797885	-6.31811
62.532	94.392	0.071365	-6.15714
63.879	91.106	0.071365	-6.15714
60.43	90.1	0.071365	-6.15714
64.319	90.043	0.071365	-6.15714
63.417	89.072	0.071365	-6.15714
65.21	88.44	0.071365	-6.15714
65.252	87.937	0.071365	-6.15714
58.212	87.543	0.071365	-6.15714
57.17	86.874	0.071365	-6.15714
55.917	86.679	0.071365	-6.15714
59.218	85.108	0.071365	-6.15714
61.219	84.835	0.071365	-6.15714
65.741	84.657	0.071365	-6.15714
60.623	81.741	0.071365	-6.15714
51.59	80.459	0.071365	-6.15714
61.848	80.243	0.071365	-6.15714
59.19	79.38	0.071365	-6.15714
48.757	76.412	0.071365	-6.15714
59.414	76.072	0.071365	-6.15714
63.728	75.694	0.071365	-6.15714
56.772	75.183	0.071365	-6.15714
58.032	73.557	0.071365	-6.15714
62.828	73.457	0.071365	-6.15714
60.417	73.372	0.071365	-6.15714
57.74	72.68	0.071365	-6.15714
63.575	72.575	0.071365	-6.15714
55.019	71.914	0.071365	-6.15714
68.697	71.539	0.071365	-6.15714
46.483	71.481	0.071365	-6.15714
64.979	71.301	0.071365	-6.15714
69.774	68.874	0.071365	-6.15714
60.261	68.826	0.071365	-6.15714
57.628	68.743	0.071365	-6.15714
62.501	67.532	0.071365	-6.15714
68.137	67.501	0.071365	-6.15714
51.943	67.188	0.071365	-6.15714
51.143	66.559	0.071365	-6.15714
49.908	65.803	0.071365	-6.15714
71.91	65.67	0.071365	-6.15714
64.972	65.443	0.071365	-6.15714
61.598	64.872	0.071365	-6.15714
59.517	64.681	0.071365	-6.15714
40.31	64.59	0.071365	-6.15714
55.346	64.052	0.071365	-6.15714
73.148	63.717	0.071365	-6.15714
62.719	63.126	0.071365	-6.15714
74.72	63.01	0.071365	-6.15714
74.345	62.928	0.071365	-6.15714
75.206	61.685	0.071365	-6.15714
73.539	61.437	0.071365	-6.15714
75.718	60.8	0.071365	-6.15714
70.068	60.116	0.071365	-6.15714
64.577	60.045	0.071365	-6.15714
72.014	59.24	0.071365	-6.15714
36.737	58.75	0.071365	-6.15714
71.519	58.715	0.071365	-6.15714
64.719	58.534	0.071365	-6.15714
39.612	57.977	0.071365	-6.15714
70.523	57.597	0.071365	-6.15714
48.414	57.595	0.071365	-6.15714
67.172	57.146	0.071365	-6.15714
68.752	57.066	0.071365	-6.15714
41.455	55.245	0.071365	-6.15714
66.572	54.885	0.071365	-6.15714
63.488	54.157	0.071365	-6.15714
66.981	54.134	0.071365	-6.15714
36.532	53.222	0.071365	-6.15714
61.139	51.295	0.071365	-6.15714
74.714	50.708	0.071365	-6.15714
79.461	50.714	0.071365	-6.15714
79.608	49.086	0.071365	-6.15714
54.277	48.87	0.071365	-6.15714
73.918	48.832	0.071365	-6.15714
66.92	48.006	0.071365	-6.15714
79.655	47.115	0.071365	-6.15714
77.556	46.856	0.071365	-6.15714
75.348	46.557	0.071365	-6.15714
75.768	46.297	0.071365	-6.15714
76.581	46.246	0.071365	-6.15714
78.87	45.914	0.071365	-6.15714
75.69	45.55	0.071365	-6.15714
59.381	45.385	0.071365	-6.15714
58.972	45.337	0.071365	-6.15714
41.146	45.165	0.071365	-6.15714
29.621	44.917	0.071365	-6.15714
74.763	44.428	0.071365	-6.15714
70.472	44.077	0.071365	-6.15714
54.1	43.47	0.071365	-6.15714
72.783	42.761	0.071365	-6.15714
79.41	42.677	0.071365	-6.15714
70.852	41.517	0.071365	-6.15714
79.686	41.092	0.071365	-6.15714
69.63	41.017	0.071365	-6.15714
53.757	40.41	0.071365	-6.15714
65.463	40.248	0.071365	-6.15714
41.699	40.077	0.071365	-6.15714
59.212	39.899	0.071365	-6.15714
73.052	39.223	0.071365	-6.15714
75.078	37.548	0.071365	-6.15714
75.608	37.461	0.071365	-6.15714
27.396	37.214	0.071365	-6.15714
70.144	36.906	0.071365	-6.15714
71.586	36.44	0.071365	-6.15714
68.923	36.134	0.071365	-6.15714
62.943	35.91	0.071365	-6.15714
60.946	35.219	0.071365	-6.15714
78.519	33.303	0.071365	-6.15714
73.448	28.577	0.071365	-6.15714
71.628	27.812	0.071365	-6.15714
68.406	26.968	0.071365	-6.15714
75.452	26.659	0.071365	-6.15714
23.761	26.603	0.071365	-6.15714
77.401	26.357	0.071365	-6.15714
73.448	26.317	0.071365	-6.15714
75.48	25.87	0.071365	-6.15714
50.685	24.735	0.071365	-6.15714
60.814	24.048	0.071365	-6.15714
67.237	23.441	0.071365	-6.15714
69.086	23.428	0.071365	-6.15714
62.308	23.081	0.071365	-6.15714
75.419	22.874	0.071365	-6.15714
69.681	22.737	0.071365	-6.15714
42.557	22.499	0.071365	-6.15714
73.692	22.065	0.071365	-6.15714
48.37	21.96	0.071365	-6.15714
38.486	20.268	0.071365	-6.15714
37.094	19.67	0.071365	-6.15714
39.415	19.388	0.071365	-6.15714
41.04	18.41	0.071365	-6.15714
75.923	18.392	0.071365	-6.15714
58.003	18.085	0.071365	-6.15714
29.99	17.435	0.071365	-6.15714
73.134	17.086	0.071365	-6.15714
59.122	16.82	0.071365	-6.15714
28.715	16.759	0.071365	-6.15714
24.908	16.722	0.071365	-6.15714
47.657	15.819	0.071365	-6.15714
66.372	15.497	0.071365	-6.15714
40.337	15.15	0.071365	-6.15714
52.299	15.143	0.071365	-6.15714
65.023	15.139	0.071365	-6.15714
54.488	15.021	0.071365	-6.15714
69.961	14.915	0.071365	-6.15714
49.82	14.81	0.071365	-6.15714
56.499	14.674	0.071365	-6.15714
60.088	14.366	0.071365	-6.15714
70.834	13.75	0.071365	-6.15714
30.506	13.21	0.071365	-6.15714
35.252	12.277	0.071365	-6.15714
56.748	12.023	0.071365	-6.15714
59.892	11.888	0.071365	-6.15714
43.35	10.47	0.071365	-6.15714
55.654	10.25	0.071365	-6.15714
44.07	10.04	0.071365	-6.15714

## Sheet: TGSD
	Deposit			Ballistic material			TGSD
Phi	mass (kg)	wt. %		mass (kg)	wt. %		mass (kg)	wt. %
< 5	6.34726	0.0102191					6.34726	0.00900547
4	91.2462	0.146906					91.2462	0.12946
3	504.464	0.812184					504.464	0.715731
2	1838.41	2.95983					1838.41	2.60833
1	2081.57	3.35132					2081.57	2.95333
0	1317.07	2.12047					1317.07	1.86865
-1	5780.71	9.30692					5780.71	8.20165
-2	6774.72	10.9073					6774.72	9.61194
-3	6852.14	11.0319					6852.14	9.72179
-4	8623	13.883					8623	12.2343
-5	13882.1	22.3501					13882.1	19.6958
-6	13665.6	22.0015		648.546	7.74818		14314.1	20.3088
-7	694.682	1.11844		3986.96	47.6322		4681.64	6.64229
-8				2552.48	30.4945		2552.48	3.62145
-9				1182.32	14.1251		1182.32	1.67747
Total Mass (kg)	62112	100		8370.3	100		70482.3	100

## Sheet: Shape parameters PHI=-1
SAMPLE	PHM_4								SAMPLE	PHM_6								SAMPLE	PHM_9
ALT		GLY		BLK		VES			ALT		GLY		BLK		VES			ALT		GLY		BLK		VES
Solidity	Frequency	Solidity	Frequency	Solidity	Frequency	Solidity	Frequency		Solidity	Frequency	Solidity	Frequency	Solidity	Frequency	Solidity	Frequency		Solidity	Frequency	Solidity	Frequency	Solidity	Frequency	Solidity	Frequency
0.7	0	0.7	0	0.7	0	0.7	0		0.7	0	0.7	0	0.7	0	0.7	0		0.7	0	0.7	0	0.7	0	0.7	0
0.75	0	0.75	0	0.75	0	0.75	0		0.75	0	0.75	0	0.75	0	0.75	0		0.75	0	0.75	0	0.75	0	0.75	0
0.8	0	0.8	0	0.8	0	0.8	0		0.8	0	0.8	0	0.8	0	0.8	0		0.8	0	0.8	0	0.8	0	0.8	0
0.85	1	0.85	1	0.85	0	0.85	1		0.85	2	0.85	1	0.85	0	0.85	0		0.85	0	0.85	0	0.85	0	0.85	0
0.9	1	0.9	5	0.9	4	0.9	6		0.9	4	0.9	5	0.9	0	0.9	4		0.9	3	0.9	6	0.9	2	0.9	2
0.95	13	0.95	9	0.95	8	0.95	8		0.95	10	0.95	9	0.95	14	0.95	12		0.95	14	0.95	11	0.95	12	0.95	14
0.98	0	0.98	1	0.98	3	0.98	0		0.98	0	0.98	0	0.98	1	0.98	0		0.98	1	0.98	0	0.98	1	0.98	0
1	0	1	0	1	0	1	0		1	0	1	0	1	0	1	0		1	0	1	0	1	0	1	0
Altro	0	Altro	0	Altro	0	Altro	0		Altro	0	Altro	0	Altro	0	Altro	0		Altro	0	Altro	0	Altro	0	Altro	0
SAMPLE	PHM_4								SAMPLE	PHM_6								SAMPLE	PHM_9
ALT		GLY		BLK		VES			ALT		GLY		BLK		VES			ALT		GLY		BLK		VES
Convexity	Frequency	Convexity	Frequency	Convexity	Frequency	Convexity	Frequency		Convexity	Frequency	Convexity	Frequency	Convexity	Frequency	Convexity	Frequency		Convexity	Frequency	Convexity	Frequency	Convexity	Frequency	Convexity	Frequency
0.7	0	0.7	0	0.7	0	0.7	0		0.7	0	0.7	0	0.7	0	0.7	0		0.7	0	0.7	0	0.7	0	0.7	0
0.75	0	0.75	0	0.75	0	0.75	0		0.75	1	0.75	1	0.75	0	0.75	1		0.75	0	0.75	0	0.75	0	0.75	0
0.8	1	0.8	5	0.8	1	0.8	4		0.8	8	0.8	8	0.8	0	0.8	3		0.8	2	0.8	5	0.8	2	0.8	0
0.85	9	0.85	6	0.85	5	0.85	7		0.85	7	0.85	6	0.85	5	0.85	8		0.85	12	0.85	11	0.85	4	0.85	8
0.9	5	0.9	5	0.9	6	0.9	4		0.9	0	0.9	0	0.9	10	0.9	4		0.9	4	0.9	1	0.9	8	0.9	8
0.95	0	0.95	0	0.95	3	0.95	0		0.95	0	0.95	0	0.95	0	0.95	0		0.95	0	0.95	0	0.95	1	0.95	0
1	0	1	0	1	0	1	0		1	0	1	0	1	0	1	0		1	0	1	0	1	0	1	0
Altro	0	Altro	0	Altro	0	Altro	0		Altro	0	Altro	0	Altro	0	Altro	0		Altro	0	Altro	0	Altro	0	Altro	0
SAMPLE	PHM_4								SAMPLE	PHM_6								SAMPLE	PHM_9
ALT		GLY		BLK		VES			ALT		GLY		BLK		VES			ALT		GLY		BLK		VES
Ax. Ratio	Frequency	Ax. Ratio	Frequency	Ax. Ratio	Frequency	Ax. Ratio	Frequency		Ax. Ratio	Frequency	Ax. Ratio	Frequency	Ax. Ratio	Frequency	Ax. Ratio	Frequency		Ax. Ratio	Frequency	Ax. Ratio	Frequency	Ax. Ratio	Frequency	Ax. Ratio	Frequency
0.3	0	0.3	0	0.3	0	0.3	0		0.3	0	0.3	0	0.3	0	0.3	0		0.3	0	0.3	0	0.3	0	0.3	0
0.4	0	0.4	0	0.4	0	0.4	0		0.4	1	0.4	0	0.4	0	0.4	0		0.4	0	0.4	0	0.4	0	0.4	0
0.5	1	0.5	6	0.5	1	0.5	2		0.5	7	0.5	5	0.5	0	0.5	3		0.5	2	0.5	3	0.5	3	0.5	0
0.6	6	0.6	3	0.6	6	0.6	9		0.6	5	0.6	9	0.6	7	0.6	7		0.6	8	0.6	10	0.6	2	0.6	3
0.7	8	0.7	7	0.7	3	0.7	4		0.7	3	0.7	1	0.7	8	0.7	6		0.7	6	0.7	4	0.7	9	0.7	12
0.8	0	0.8	0	0.8	5	0.8	0		0.8	0	0.8	0	0.8	0	0.8	0		0.8	2	0.8	0	0.8	1	0.8	1
0.9	0	0.9	0	0.9	0	0.9	0		0.9	0	0.9	0	0.9	0	0.9	0		0.9	0	0.9	0	0.9	0	0.9	0
Altro	0	Altro	0	Altro	0	Altro	0		Altro	0	Altro	0	Altro	0	Altro	0		Altro	0	Altro	0	Altro	0	Altro	0
PHM_4	Phi -1	Rapp.ass.							PHM_6	Phi -1	Rapp.ass.							PHM_9	Phi -1	Rapp.ass.
A - scorie alterate		B - scorie vetrose		D - c. blocky		E - c. vescicolati			A - scorie alterate		B - scorie vetrose		D - blocky		E - vescicolati			A - scorie alterate		B - scorie vetrose		D - blocky		E - vescicolati
Classe	Frequenza	Classe	Frequenza	Classe	Frequenza	Classe	Frequenza		Classe	Frequenza	Classe	Frequenza	Classe	Frequenza	Classe	Frequenza		Classe	Frequenza	Classe	Frequenza	Classe	Frequenza	Classe	Frequenza
0.4	0	0.4	0	0.4	0	0.4	0		0.4	0	0.4	0	0.4	0	0.4	0		0.4	0	0.4	0	0.4	0	0.4	0
0.5	0	0.5	0	0.5	2	0.5	0		0.5	0	0.5	0	0.5	0	0.5	1		0.5	0	0.5	0	0.5	1	0.5	0
0.6	2	0.6	2	0.6	1	0.6	1		0.6	0	0.6	0	0.6	2	0.6	2		0.6	0	0.6	3	0.6	2	0.6	2
0.7	4	0.7	6	0.7	5	0.7	2		0.7	4	0.7	2	0.7	3	0.7	1		0.7	5	0.7	3	0.7	3	0.7	2
0.9	7	0.9	8	0.9	6	0.9	12		0.9	9	0.9	12	0.9	9	0.9	11		0.9	11	0.9	9	0.9	7	0.9	11
0.97	2	0.97	0	0.97	1	0.97	0		0.97	3	0.97	1	0.97	1	0.97	1		0.97	2	0.97	2	0.97	2	0.97	1
1	0	1	0	1	0	1	0		1	0	1	0	1	0	1	0		1	0	1	0	1	0	1	0
Altro	0	Altro	0	Altro	0	Altro	0		Altro	0	Altro	0	Altro	0	Altro	0		Altro	0	Altro	0	Altro	0	Altro	0

## Sheet: Shape parameters PHI=1
SAMPLE	PHM_4										SAMPLE	PHM_6										SAMPLE	PHM_9
ALT		GLY		FLU		BLK		VES			ALT		GLY		FLU		BLK		VES			ALT		GLY		FLU		BLK		VES
Solidity	Frequency	Solidity	Frequency	Solidity	Frequency	Solidity	Frequency	Solidity	Frequency		Solidity	Frequency	Solidity	Frequency	Solidity	Frequency	Solidity	Frequency	Solidity	Frequency		Solidity	Frequency	Solidity	Frequency	Solidity	Frequency	Solidity	Frequency	Solidity	Frequency
0.6	0	0.6	0	0.6	0	0.6	0	0.6	0		0.6	0	0.6	0	0.6	0	0.6	0	0.6	0		0.6	0	0.6	0	0.6	0	0.6	0	0.6	0
0.65	0	0.65	0	0.65	1	0.65	0	0.65	0		0.65	0	0.65	0	0.65	0	0.65	0	0.65	0		0.65	0	0.65	0	0.65	0	0.65	0	0.65	0
0.7	0	0.7	0	0.7	1	0.7	0	0.7	0		0.7	0	0.7	0	0.7	0	0.7	0	0.7	0		0.7	0	0.7	0	0.7	1	0.7	0	0.7	0
0.75	0	0.75	0	0.75	0	0.75	0	0.75	0		0.75	0	0.75	0	0.75	0	0.75	0	0.75	0		0.75	0	0.75	0	0.75	1	0.75	0	0.75	0
0.8	0	0.8	0	0.8	4	0.8	0	0.8	4		0.8	0	0.8	0	0.8	3	0.8	0	0.8	1		0.8	0	0.8	1	0.8	1	0.8	0	0.8	1
0.85	0	0.85	2	0.85	6	0.85	0	0.85	2		0.85	0	0.85	1	0.85	3	0.85	0	0.85	0		0.85	2	0.85	1	0.85	5	0.85	0	0.85	2
0.9	4	0.9	7	0.9	5	0.9	2	0.9	5		0.9	2	0.9	1	0.9	11	0.9	1	0.9	5		0.9	3	0.9	9	0.9	7	0.9	4	0.9	3
0.95	13	0.95	11	0.95	3	0.95	15	0.95	8		0.95	16	0.95	18	0.95	6	0.95	14	0.95	11		0.95	15	0.95	9	0.95	6	0.95	12	0.95	13
0.99	3	0.99	0	0.99	0	0.99	3	0.99	0		0.99	2	0.99	0	0.99	0	0.99	5	0.99	3		0.99	0	0.99	0	0.99	0	0.99	4	0.99	1
1	0	1	0	1	0	1	0	1	0		1	0	1	0	1	0	1	0	1	0		1	0	1	0	1	0	1	0	1	0
SAMPLE	PHM_4										SAMPLE	PHM_6										SAMPLE	PHM_9
ALT		GLY		FLU		BLK		VES			ALT		GLY		FLU		BLK		VES			ALT		GLY		FLU		BLK		VES
Convexity	Frequency	Convexity	Frequency	Convexity	Frequency	Convexity	Frequency	Convexity	Frequency		Convexity	Frequency	Convexity	Frequency	Convexity	Frequency	Convexity	Frequency	Convexity	Frequency		Convexity	Frequency	Convexity	Frequency	Convexity	Frequency	Convexity	Frequency	Convexity	Frequency
0.6	0	0.6	0	0.6	0	0.6	0	0.6	0		0.6	0	0.6	0	0.6	0	0.6	0	0.6	0		0.6	0	0.6	0	0.6	0	0.6	0	0.6	0
0.65	0	0.65	0	0.65	0	0.65	0	0.65	0		0.65	0	0.65	0	0.65	1	0.65	0	0.65	0		0.65	0	0.65	0	0.65	1	0.65	0	0.65	0
0.7	0	0.7	1	0.7	2	0.7	0	0.7	1		0.7	0	0.7	0	0.7	0	0.7	0	0.7	0		0.7	0	0.7	1	0.7	3	0.7	0	0.7	1
0.75	1	0.75	1	0.75	10	0.75	0	0.75	0		0.75	1	0.75	1	0.75	3	0.75	0	0.75	0		0.75	0	0.75	0	0.75	2	0.75	0	0.75	0
0.8	3	0.8	6	0.8	3	0.8	0	0.8	3		0.8	1	0.8	2	0.8	4	0.8	0	0.8	1		0.8	3	0.8	5	0.8	8	0.8	0	0.8	1
0.85	8	0.85	9	0.85	4	0.85	5	0.85	12		0.85	10	0.85	14	0.85	7	0.85	1	0.85	4		0.85	12	0.85	10	0.85	5	0.85	2	0.85	3
0.9	8	0.9	3	0.9	1	0.9	9	0.9	2		0.9	8	0.9	3	0.9	8	0.9	12	0.9	10		0.9	5	0.9	4	0.9	2	0.9	9	0.9	11
0.95	0	0.95	0	0.95	0	0.95	6	0.95	1		0.95	0	0.95	0	0.95	0	0.95	7	0.95	5		0.95	0	0.95	0	0.95	0	0.95	9	0.95	4
1	0	1	0	1	0	1	0	1	0		1	0	1	0	1	0	1	0	1	0		1	0	1	0	1	0	1	0	1	0
SAMPLE	PHM_4										SAMPLE	PHM_6										SAMPLE	PHM_9
ALT		GLY		FLU		BLK		VES			ALT		GLY		FLU		BLK		VES			ALT		GLY		FLU		BLK		VES
Ax. Ratio	Frequency	Ax. Ratio	Frequency	Ax. Ratio	Frequency	Ax. Ratio	Frequency	Ax. Ratio	Frequency		Ax. Ratio	Frequency	Ax. Ratio	Frequency	Ax. Ratio	Frequency	Ax. Ratio	Frequency	Ax. Ratio	Frequency		Ax. Ratio	Frequency	Ax. Ratio	Frequency	Ax. Ratio	Frequency	Ax. Ratio	Frequency	Ax. Ratio	Frequency
0.3	0	0.3	0	0.3	0	0.3	0	0.3	0		0.3	0	0.3	0	0.3	0	0.3	0	0.3	0		0.3	0	0.3	0	0.3	0	0.3	0	0.3	0
0.45	0	0.45	0	0.45	2	0.45	1	0.45	1		0.45	0	0.45	0	0.45	2	0.45	1	0.45	0		0.45	0	0.45	0	0.45	2	0.45	0	0.45	2
0.6	1	0.6	2	0.6	4	0.6	1	0.6	1		0.6	2	0.6	3	0.6	2	0.6	6	0.6	6		0.6	2	0.6	3	0.6	6	0.6	1	0.6	6
0.75	5	0.75	6	0.75	9	0.75	12	0.75	8		0.75	12	0.75	8	0.75	10	0.75	8	0.75	7		0.75	11	0.75	7	0.75	4	0.75	11	0.75	8
0.9	11	0.9	9	0.9	5	0.9	4	0.9	6		0.9	4	0.9	6	0.9	7	0.9	4	0.9	5		0.9	6	0.9	10	0.9	9	0.9	6	0.9	2
0.99	3	0.99	3	0.99	0	0.99	2	0.99	3		0.99	2	0.99	3	0.99	2	0.99	1	0.99	2		0.99	1	0.99	0	0.99	0	0.99	2	0.99	2
1	0	1	0	1	0	1	0	1	0		1	0	1	0	1	0	1	0	1	0		1	0	1	0	1	0	1	0	1	0
