# Supplementary material
Source: publisher figshare collection journal article supplement (https://gsapubs.figshare.com/articles/dataset/_/24088311)
Supplement: Supplementary file 2 [file 2]

| Table S1. List of samples with date of sampling, typology, coordinates, mass load per square meter (where available), and performed analyses |                      |                             |               |              |                               |            |          |                              |
|----------------------------------------------------------------------------------------------------------------------------------------------|----------------------|-----------------------------|---------------|--------------|-------------------------------|------------|----------|------------------------------|
| Sample                                                                                                                                       | Sampling date (2017) | Typology                    | Coordinates   |              | Mass load (g/m <sup>2</sup> ) | Grain-size |          | Density (g/cm <sup>3</sup> ) |
|                                                                                                                                              |                      |                             | Latitude      | Longitude    |                               | Sieving    | CAMSIZER |                              |
| PH1                                                                                                                                          | 17 March             | Total deposit               | -             | -            | 310                           | X          | X        |                              |
| PH2                                                                                                                                          | 17 March             | Total deposit <sup>1</sup>  | -             | -            | 1128                          | X          | X        | X                            |
| PH3                                                                                                                                          | 17 March             | Total deposit <sup>1</sup>  | -             | -            | 428                           | X          |          |                              |
| PH4                                                                                                                                          | 17 March             | Total deposit               | -             | -            | 6881                          | X          | X        | X                            |
| PH5                                                                                                                                          | 17 March             | Total deposit               | -             | -            | 17294                         | X          | X        | X                            |
| PH6                                                                                                                                          | 17 March             | Total deposit <sup>2</sup>  | -             | -            | 7216                          | X          | X        | X                            |
| PH7                                                                                                                                          | 17 March             | Total deposit <sup>2</sup>  | -             | -            | 18396                         | X          | X        | X                            |
| PH8                                                                                                                                          | 17 March             | Altered clasts <sup>3</sup> | -             | -            | -                             |            |          |                              |
| PH9                                                                                                                                          | 17 March             | Total deposit               | -             | -            | 4870                          | X          | X        | X                            |
| PH10                                                                                                                                         | 17 March             | Total deposit               | -             | -            | 1469                          | X          | X        | X                            |
| PH11                                                                                                                                         | 21 September         | Upwind clasts               | 37°43'52.71"N | 15°0'36.62"E | -                             |            |          |                              |
| PH12                                                                                                                                         | 21 September         | Upwind clasts               | 37°43'52.75"N | 15°0'36.52"E | -                             |            |          | X                            |
| PH13                                                                                                                                         | 24 March             | 3 largest clasts            | 37°43'51.14"N | 15°0'29.62"E | -                             |            |          |                              |
| PH14                                                                                                                                         | 24 March             | 29 clasts ( $\phi - 3/-5$ ) | 37°43'51.14"N | 15°0'29.62"E | -                             |            |          | X                            |
| PH15                                                                                                                                         | 24 March             | 3 largest clasts            | 37°43'51.00"N | 15°0'29.20"E | -                             |            |          |                              |
| PH16                                                                                                                                         | 24 March             | 3 largest clasts            | 37°43'50.71"N | 15°0'28.39"E | -                             |            |          |                              |
| PH17                                                                                                                                         | 24 March             | 16 clasts ( $\phi - 4/-5$ ) | 37°43'50.71"N | 15°0'28.39"E | -                             |            |          | X                            |
| PH18                                                                                                                                         | 24 March             | Total deposit               | 37°43'50.44"N | 15°0'26.74"E | 722                           | X          | X        | X                            |
| PH19                                                                                                                                         | 24 March             | 6 clasts ( $\phi - 4/-6$ )  | 37°43'50.19"N | 15°0'26.75"E | -                             |            |          | X                            |
| PH20                                                                                                                                         | 17 October           | Block                       | 37°43'51.84"N | 15°0'31.90"E | -                             |            |          |                              |
| PH21                                                                                                                                         | 17 October           | Block                       | 37°43'51.70"N | 15°0'31.83"E | -                             |            |          |                              |
| PH22                                                                                                                                         | 17 October           | Block                       | 37°43'51.94"N | 15°0'31.95"E | -                             |            |          |                              |
| PH23                                                                                                                                         | 17 October           | Block                       | 37°43'51.64"N | 15°0'31.78"E | -                             |            |          |                              |
| PH24                                                                                                                                         | 2 November           | 38 clasts ( $\phi - 6$ )    | 37°43'51.26"N | 15°0'32.15"E | -                             |            |          |                              |
| PH25                                                                                                                                         | 2 November           | 33 clasts ( $\phi - 6$ )    | 37°43'50.57"N | 15°0'32.04"E | -                             |            |          |                              |
| PH26                                                                                                                                         | 2 November           | 30 clasts ( $\phi - 6$ )    | 37°43'52.06"N | 15°0'32.07"E | -                             |            |          |                              |
| PH27                                                                                                                                         | 2 November           | 35 clasts ( $\phi - 6$ )    | 37°43'52.75"N | 15°0'31.72"E | -                             |            |          |                              |
| PH28                                                                                                                                         | 2 November           | 42 clasts ( $\phi - 6$ )    | 37°43'53.46"N | 15°0'31.20"E | -                             |            |          |                              |
| PH29                                                                                                                                         | 2 November           | 34 clasts ( $\phi - 6$ )    | 37°43'51.76"N | 15°0'31.34"E | -                             |            |          |                              |
| PH30                                                                                                                                         | 2 November           | 35 clasts ( $\phi - 6$ )    | 37°43'52.32"N | 15°0'30.93"E | -                             |            |          |                              |
| PH31                                                                                                                                         | 2 November           | 35 clasts ( $\phi - 6$ )    | 37°43'52.90"N | 15°0'30.61"E | -                             |            |          |                              |
| PH32                                                                                                                                         | 2 November           | 38 clasts ( $\phi - 6$ )    | 37°43'51.14"N | 15°0'31.37"E | -                             |            |          |                              |
| PH33                                                                                                                                         | 2 November           | 35 clasts ( $\phi - 6$ )    | 37°43'50.52"N | 15°0'31.21"E | -                             |            |          |                              |

<sup>1</sup>Samples PH2 and PH3 were collected from the same sampling site. They include the coarse and fine portions of the total deposit, respectively.

<sup>2</sup>Samples PH6 and PH7 were collected from the same sampling site. They include the coarse and fine portions of the total deposit, respectively.

<sup>3</sup>Sample PH8 sample includes selected and altered clasts collected around the previous 6 sampling sites
